# Supplementary material for: Suppression of ASKβ (AtSK32), a Clade III Arabidopsis GSK3, Leads to the Pollen Defect during Late Pollen Development
Source: PubMed Central journal article supplement — Mol Cells. 2015 May 22;38(6):506–17. doi: 10.14348/molcells.2015.2323 (PMC4469908; doi:10.14348/molcells.2015.2323), 2015-05-22
Supplement: molce-38-6-506-supple.pdf [file molce-38-6-506-supple.pdf]

## Supplementary Figures

**Figure S1.** Sequence alignment of ASKs showing functional domains.

**Figure S2.** Expression characteristics of *ASKβ* in *Arabidopsis*.

**Figure S3.** Anther and mature pollen grain phenotype along with ASKs gene expression levels comparison among WT and *ASKβ* antisense transgenic.

**Figure S4.** Comparison of anther development between wild-type and *ASKβ*-antisense plants.

**Figure S5.** Organization of the conserved *cis*-elements in the promoter regions of *ASKβ* and its 32 co-expressed genes.

**Figure S6.** The expression patterns of *ASKs* in *Arabidopsis*. Information was obtained from public databases.

```

ASKα -----MASLPLGPQ--PHALAPPLQLHDGDALKRRPELDSDKEMSAAVIEGNDVAVTGH 52
ASKβ -----MTSIPLGPQPPLAPQPPLHGGDLSLKRPPDIDNDKEMSAAVIEGNDVAVTGH 54
ASKγ -----MADDKEMPAAVVDGHDQVTGH 22
ASKα -----MASVGIAPNPGARDSTG---VDKLPPEEMDMKIRDDKEMEATVVDGNGTETGHI 51
ASKβ -----MASVGIEPSAAVRESTGNVTDADRLPEEMDMKIQDDKEMEATVINGNVTETGHI 55
ASKγ -----MASVGTLPASSMATQSNASICAELKPEGINEMKIQDDKEMEAAVVDGNGTETGHI 56
ASKκ -----MASSGLNGVGTSSAKGLKSSSSVDWLRDLAETRIKRDVETDDEERDSEPDIDGGAEPGHV 65
ASKδ -----MESHLLNGVGTSSAKNTKNTSSVDWLRDMLKIRDKTEADDEERDSEPDIDGGAEPGHV 64
ASKθ MNVVRRLTSIASGRNFVSSDNDVGETETPRSKPNQNR-----ETESTETTSYKEDSVSSSENSDHLPEKIREDDMDCGIIKNGTETSGRI 84
ASKθ MNVMRRLTSIASGRNTSSDPPGGDYALKRAKLDQENDNLCDPDMQVDQNSSCFEMKADVLSSQESVAGTSNVPVSEKPVDDQLPDVMIEMKIRDERNANREDKMETTVVNGSGTETGQQ 120

```

▼  
**nucleotide binding      ATP binding**

```

ASKα ISTTIGKNGPEPKQTSYMAERVWGTGSGFVIFQAKCLETGESVAIKVLQDRRYKNEQLQMRPMDHPNVIKLCFFSTTSRDELFLNLVMEVPELTVRVLRYHTYSSNQRMPFIYVK 172
ASKβ ISTTIGKNGPEPKQTSYMAERVWGTGSGFVIFQAKCLETGESVAIKVLQDRRYKNEQLQMRMDHPNVIKLCFFSTTTRDELFLNLVMEVPELTVRVLKHYTSSNQRMPFIYVK 174
ASKγ ISTTIGKNGPEPKQTSYMAERVWGTGSGFVIFQAKCLETGESVAIKVLQDRRYKNEQLQMRVMDHPNVIKLCFFSTTSKDELFLNLVMEVPELTVRVLKHYSSNQRMPFIYVK 142
ASKα IVTTIGRNGOPKQTSYMAERVWGTGSGFVIFQAKCLETGESVAIKVLQDRRYKNEQLQMRLLDHPNVIKLCFFSTTEKDELFLNLVLEVPETVHRVIKHYKLNQRMLPIYVK 171
ASKβ IVTTIGRNGOPKQTSYMAERVWGTGSGFVIFQAKCLETGESVAIKVLQDRRYKNEQLQMRLLDHPNVIKLCFFSTTEKDELFLNLVLEVPETVHRVIKHYKLNQRMLPIYVK 175
ASKγ IVTTIGKNGOPKQTSYMAERVWGTGSGFVIFQAKCLETGESVAIKVLQDRRYKNEQLQMRLLDHPNVIKLCFFSTTEKDELFLNLVLEVPETVHRVSKHYSSNQRMPFIYVK 176
ASKκ IRTTLRGRNGSQSGRTVSYSEHWGTGSGFVIFQAKCRETEGEVAIKVLQDRRYKNEQLQMRLLDHPNVAIKHSFFSRDNEEYFLNLVLEVPETVNRVRSYRTNQLMPLIYVK 185
ASKδ ITTLLPGRNGSQSGRTVSYIAEHVWGTGSGFVIFQAKCRETEGEVAIKVLQDRRYKNEQLQMRLLDHPNVIKHSFFSRDNEEYFLNLVLEVPETVNRVRSYRTNQLMPLIYVK 184
ASKθ ITTTKKGKLDKDKTISYRAEHWGTGSGFVIFQAKLETEGEVAIKVLQDRRYKNEQLQMRLLDHPNVIKHSFFSTTEKDELFLNLVLEVPETVIRNRSYRTNQLMPLIYVK 204
ASKθ ITTTVGGRDGPKQTSYMAQRVWGTGSGFVIFQAKCLETGESVAIKVLQDRRYKNEQLQMRLLDHPNVIKHSFFSTTEKDELFLNLVLEVPETVIRNRSYRTNQLMPLIYVK 240

```

↑  
**phosphorylation site within activation loop of tyrosine phosphorylation of MPK6**

```

ASKα LYTQIFRGLAYIHTAPGVCHRDKVQPNLLVDPLTHQVKLIDFGSAKVLVKGEPNISITCSRWRAPDLIFGATEYTSIDVWSAGCVLAELLGQPLPFGENSVDQLVEIKVLGTPTR 292
ASKβ LYTQIFRGLAYIHTAPGVCHRDKVQPNLLVDPLTHQVKLIDFGSAKVLVKGEPNISITCSRWRAPDLIFGATEYTSIDVWSAGCVLAELLGQPLPFGENSVDQLVEIKVLGTPTR 294
ASKγ LYMVQIFRGLAYIHTAPGVCHRDKVQPNLLVDPLTHQVKLIDFGSAKVLVKGEPNISITCSRWRAPDLIFGATEYTSIDVWSAGCVLAELLGQPLPFGENAVDQLVEIKVLGTPTR 262
ASKα LYTQIFRGLAYIHTAPGVCHRDKVQPNLLVDPLTHQVKLIDFGSAKVLVKGEPNISITCSRWRAPDLIFGATEYTTAIDVWSAGCVLAELLGQPLPFGESVDQLVEIKVLGTPTR 291
ASKβ LYTQIFRGLAYIHTAPGVCHRDKVQPNLLVDPLTHQVKLIDFGSAKVLVKGEPNISITCSRWRAPDLIFGATEYTTAIDVWSAGCVLAELLGQPLPFGESVDQLVEIKVLGTPTR 295
ASKγ LYTQICRALAYIHGGVGVCHRDKVQPNLLVDPLTHQVKLIDFGSAKVLVKGEPNISITCSRWRAPDLIFGATEYTTAIDVWSAGCVLAELLGQPLPFGESVDQLVEIKVLGTPTR 296
ASKκ LYTQICRALAYIHTAPGVCHRDKVQPNLLVDPLTHQVKLIDFGSAKVLVKGEPNISITCSRWRAPDLIFGATEYTTAIDVWSAGCVLAELLGQPLPFGESVDQLVEIKVLGTPTR 305
ASKδ LYTQICRALAYIHTAPGVCHRDKVQPNLLVDPLTHQVKLIDFGSAKVLVKGEPNISITCSRWRAPDLIFGATEYTTAIDVWSAGCVLAELLGQPLPFGESVDQLVEIKVLGTPTR 304
ASKθ LYTQICRAMNVLHQVGVCHRDKVQPNLLVDPLTHQVKLIDFGSAKVLVKGEPNISITCSRWRAPDLIFGATEYTTAIDVWSAGCVLAELLGQPLPFGESVDQLVEIKVLGTPTR 324
ASKθ LYTQICRALNVLHRVGVCHRDKVQPNLLVDPLTHQVKLIDFGSAKVLVKGEPNISITCSRWRAPDLIFGATEYTTAIDVWSAGCVLAELLGQPLPFGESVDQLVEIKVLGTPTR 360

```

```

ASKα EEIRCMNPNTDFRFPQIKAHFWHKIFHKRMPPEAIDLASRLQYSPSLRCTALEACAHPPFDELREPNARLPNGRPLPPLFNFK--QELSGASPELINRLIPEHVRQMGSTGLQNS--- 407
ASKβ EEIRCMNPNTDFRFPQIKAHFWHKIFHKRMPPEAIDLASRLQYSPSLRCTALEACAHPPFDELREPNARLPNGRPLPPLFNFK--QELSGASPELINRLIPEHVRQMGSTGLQNS--- 412
ASKγ EEIRCMNPNTDFRFPQIKAHFWHKIFHKRMPPEAIDLASRLQYSPSLRCTALEACAHPPFDELREPNARLPNGRPLPPLFNFK--QEVAGSSPELVNKLIPDHIKRLGLSFLNGSGT 380
ASKα EEIKCMNPNTDFRFPQIKAHFWHKIFHKRMPPEAVDLVSRLLQYSPNLSAALDVLVHPFFDELREPNARLPNGRPLPPLFNFKPHELKGVPEVMVAKLVPEHARKQCPWLSL---- 405
ASKβ EEIKCMNPNTDFRFPQIKAHFWHKIFHKRMPPEAVDLVSRLLQYSPNLSAALDVLVHPFFDELREPNARLPNGRPLPPLFNFKPHELKGVPEVMVAKLVPEHARKQCPWLSL---- 409
ASKγ EEIKCMNPNTDFRFPQIKAHFWHKIFHKRMPPEAVDLVSRLLQYSPNLSAALDVLVHPFFDELREPNARLPNGRPLPPLFNFKPHELKGVPEVMVAKLVPEHARKQCPWLSL---- 410
ASKκ EEIKCMNPNTDFRFPQIKAHFWHKIFHKRMPPEAVDLVSRLLQYSPNLSAALDVLVHPFFDELREPNARLPNGRPLPPLFNFKPHELKGVPEVMVAKLVPEHARKQCPWLSL---- 421
ASKδ EEIKCMNPNTDFRFPQIKAHFWHKIFHKRMPPEAVDLVSRLLQYSPNLSAALDVLVHPFFDELREPNARLPNGRPLPPLFNFKPHELKGVPEVMVAKLVPEHARKQCPWLSL---- 410
ASKθ EEIKCMNPNTDFRFPQIKAHFWHKIFHKRMPPEAVDLVSRLLQYSPNLSAALDVLVHPFFDELREPNARLPNGRPLPPLFNFKPHELKGVPEVMVAKLVPEHARKQCPWLSL---- 420
ASKθ EEIKMNPNTDFRFPQIKAHFWHKIFFRQVSPPEAVDLVSRLLQYSPNLSAALDVLVHPFFDELREPNARLPNGRPLPPLFNFKPHELKGVPEVMVAKLVPEHARKQCPWLSL---- 431
ASKθ EEIRCMNPNTDFRFPQIKAHFWHKIFHKRMPPEAVDLVSRLLQYSPNLSAALDVLVHPFFDELREPNARLPNGRPLPPLFNFKPHELKGVPEVMVAKLVPEHARKQCPWLSL---- 472

```

**Supplementary Fig. S1.** Sequence alignment of ASKs showing functional domains. Shaded region represents protein kinase domain. The conserved phosphate-binding residues that interact with prime-phosphorylated substrate (arginine 142, arginine 226, and lysine 251 in ASK<sub>β</sub>) are highlighted in cyan. ATP binding and tyrosine phosphorylation site within the activation loop of MPK6 (de la Fuente van Bentem et al., 2008) are marked. Red line indicates the nucleotide-binding domain.

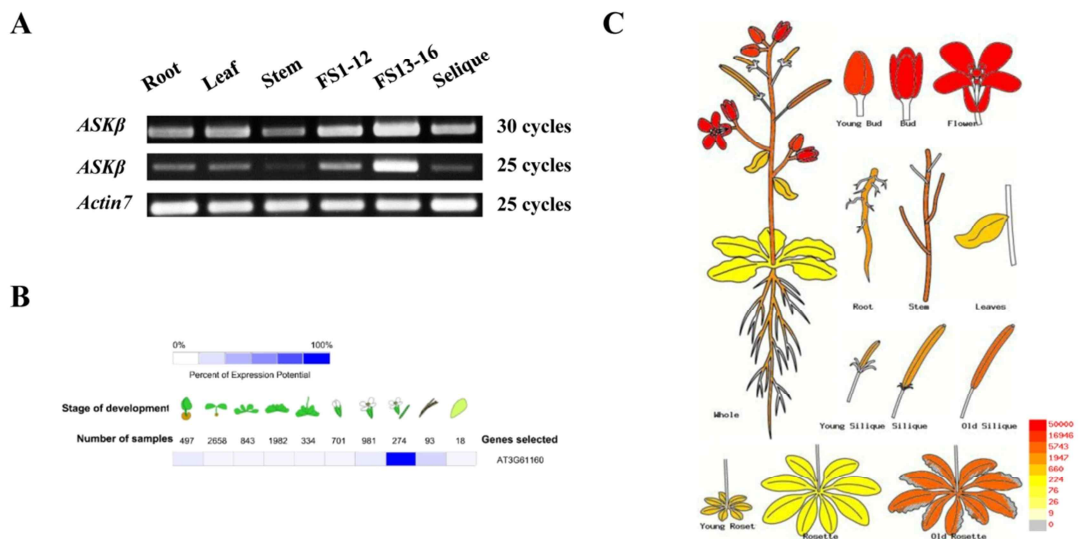

**Supplementary Fig. S2.** Expression characteristics of *ASKβ* in *Arabidopsis*. **A.** *ASKβ* expression levels in different tissues determined by semi-quantitative RT-PCR. **B.** Expression potential found in Genevestigator (<https://www.genevestigator.com/gv/>). Developmental stages (from left to right): germinating seeds, seedling, young rosette, developed rosette, bolting, young flower, developed flower, flower and silique, mature silique, and senescence. **C.** Expression patterns presented in the HanaDB-AT microarray database (<http://evolver.psc.riken.jp/seiken/graphic.cgi>).

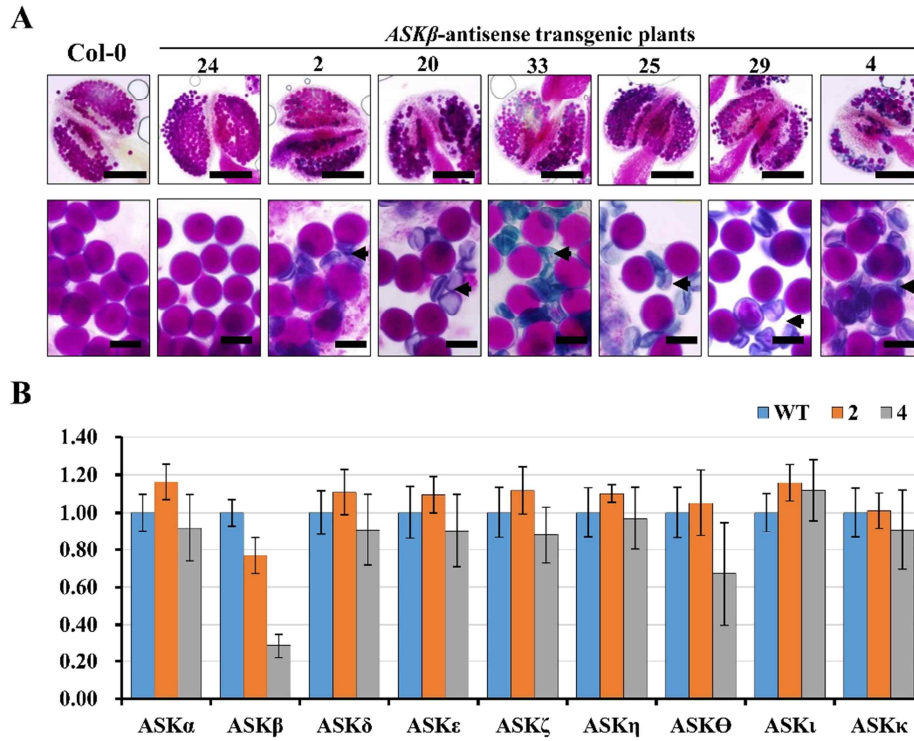

**Supplementary Fig. S3.** Phenotype of anther and mature pollen grain, along with gene expression levels of ASKs in WT and *ASKβ* antisense transgenic. **A**, whole anthers and mature pollen grain of wild type and *ASKβ* antisense transgenic lines. Upper, anthers of wild type and independent *ASKβ* antisense transgenic lines have been stained to determine pollen viability. Bar=200 μm. Lower, analysis of mature pollen grains from wild type and *ASKβ* antisense transgenic lines. Bar=20μm. Numbers indicate the independent *ASKβ* antisense transgenic lines. Black arrows indicate the defected mature pollen grains. **B**, Expression patterns of 9 ASK genes in WT, antisense transgenic line 2 and line 4. No expression signal was for *ASKγ*. Expression levels were normalized to that of *ACTIN7*. Data were obtained from three biological replicates and the error bar represents standard deviation.



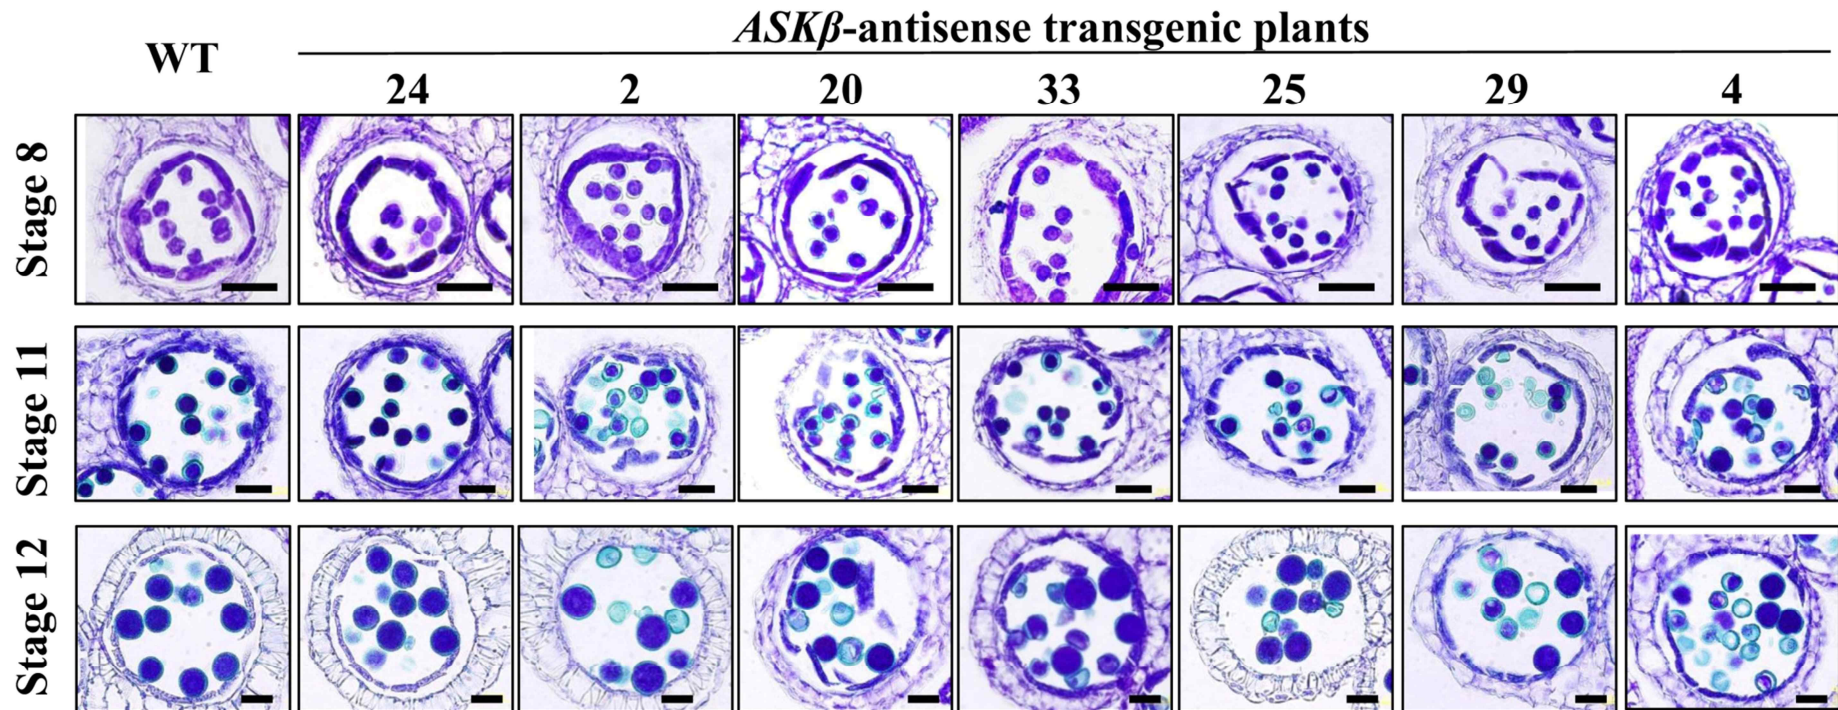

**Supplementary Fig. S4.** Comparison of anther development between wild-type and *ASKβ*-antisense plants. Semi-thin sections of representative locules were stained with toluidine blue and photographed. The developmental stages of anthers are marked on the left: stage 8 for uninucleate microspores, stage 12 for bicellular, and stage 13 for mature pollen grains. Tapetum degradation usually occurs during stage 10 and 11. Bar = 20  $\mu$ m.

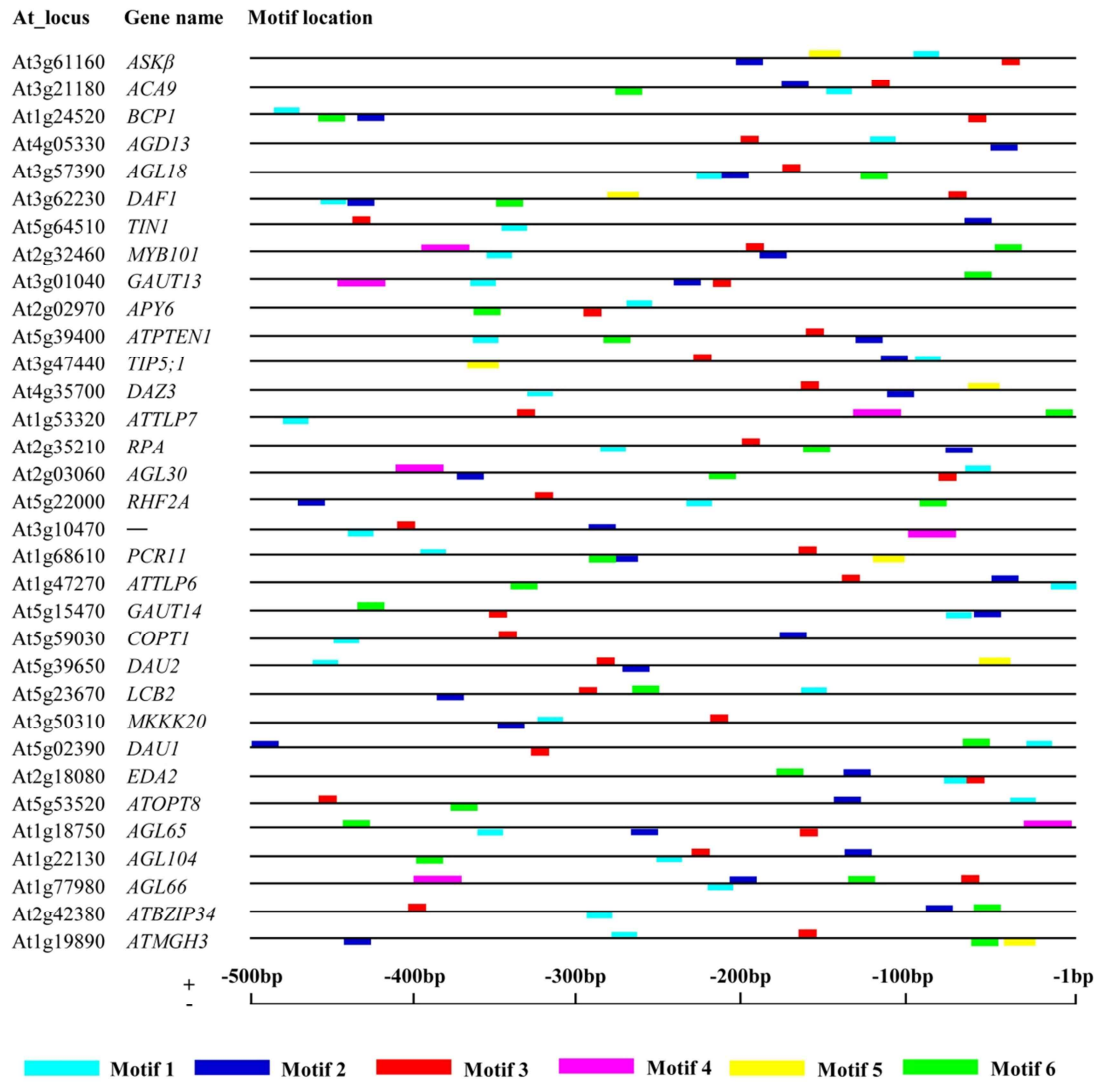

**Supplementary Fig. S5.** Organization of the conserved *cis*-elements in the promoter regions of *ASKβ* and its 32 co-expressed genes. The conserved sequences were identified with MEME version 4.9.1 (Bailey et al., 2009).

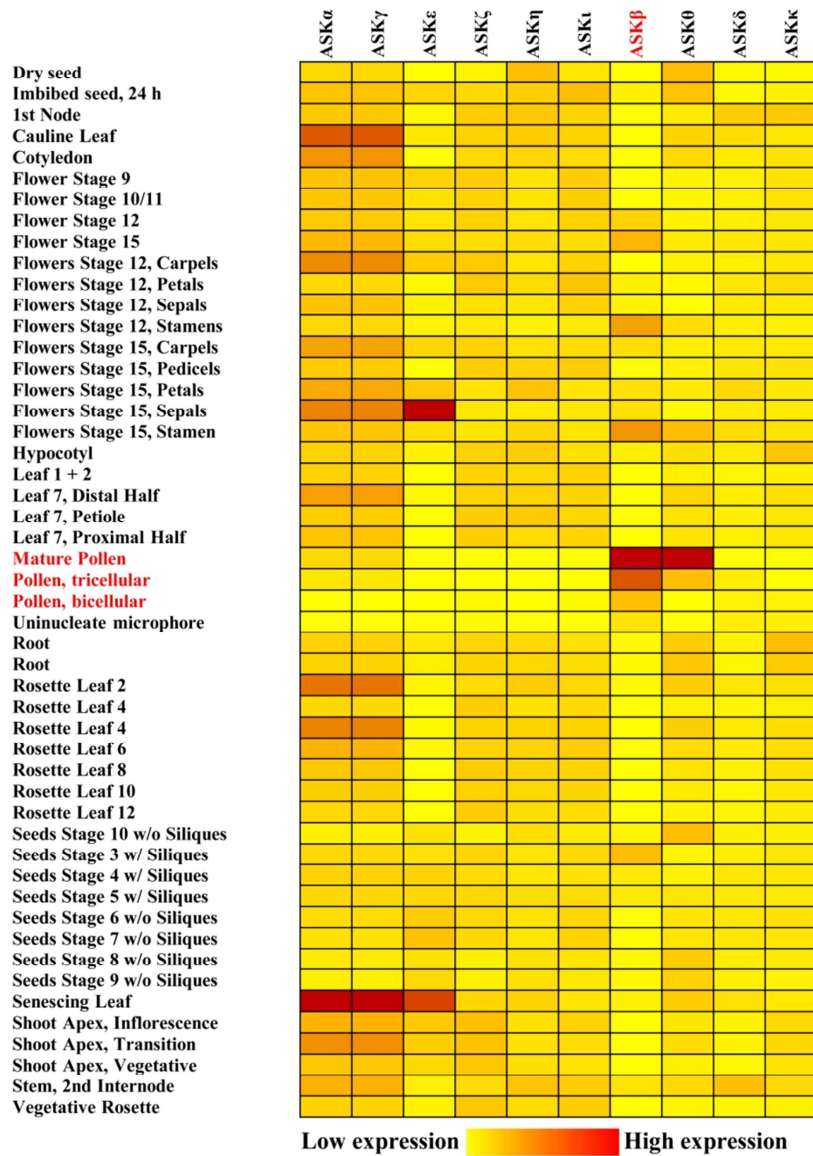

**Supplementary Fig. S6.** The expression patterns of *ASKs* in Arabidopsis. Information was obtained from public databases.

**Supplementary Table S1.** List of primers used in this study.

| Primer Name       | Primer Sequence                |                                | Product Size(bp) | Purpose                                                        |
|-------------------|--------------------------------|--------------------------------|------------------|----------------------------------------------------------------|
|                   | Forward (5'-3')                | Reverse (5'-3')                |                  |                                                                |
| <i>ASKβ -P1</i>   | ATGCGATTTTGGGAGCGCCA           | TGTGCCACGGCTGAGCTTTGA          | 314              | <i>ASKβ</i> gene expression analysis                           |
| <i>ASKKSβ -P2</i> | CGATGAATGTGGTGC GGAGATTAACG    | CATCTGCGTAGAGAAGCAGCCATTAACC   | 1354             | <i>ASKβ</i> full CDS region, for antisense construct, gDNA PCR |
| <i>ASKβ -P3</i>   | GCGGAGATTAACGAGTATTGCC         | CAGAATCTTTCTCGTACGACG          | 145              | <i>ASKβ</i> gene expression, qRT-PCR                           |
| <i>ASKθ</i>       | GCTTCGGGTCGGACCTCC             | CTCGCGGTTGGCATTTCG             | 275              | <i>ASKθ</i> gene expression                                    |
| <i>TDF1</i>       | GAGCGATTTCTTCTCTCGGACC         | GATGTATTCGGCTTCGATGTTGAAATG    | 112              | Gene expression analysis                                       |
| <i>MYB80</i>      | GTCTCCTGCCGTTGCAGCTTGGA        | AATCTCCTCTTGATCAACCACTTCTCCC   | 124              | Gene expression analysis                                       |
| <i>DAF1</i>       | CTCAGGAAGTGCAGTGGACATCATT      | CTAATGCAGCCCTTTGGTAATAGC       | 218              | Gene expression analysis                                       |
| <i>BCP1</i>       | TACTCCTGGTGACGGTGACGTTGCA      | AACGACGACCGCAGAGACGC           | 133              | Gene expression analysis                                       |
| <i>PCR11</i>      | CGGGTATGGAGGAAGCAGTCTCTAC      | CCGATGACCAAGTCCAAATCGC         | 177              | Gene expression analysis                                       |
| <i>ACA9</i>       | TCTCTGTGATTGACAGAGAGGTAAGAGA   | TCGTCTACCCAGCTTTCTTC           | 225              | Gene expression analysis                                       |
| <i>TIP5;1</i>     | CGAAAGAAATTGATGAGAAGAATGATT    | AGCCATCAATTTCTTGAAGACATG       | 165              | Gene expression analysis                                       |
| <i>ATTLP6</i>     | CTCCTCTTCGGAATCGAAGCTCA        | TTGAAATTA AAAAGCCTTCTCTTCTCG   | 113              | Gene expression analysis                                       |
| <i>35S</i>        | CAATCCACTTGCTTTGAAGAC          | CCATCATTGCGATAAAGGAAAG         | 135              | gDNA PCR for transgenic plant confirmation                     |
| <i>ASKα</i>       | CACAAATCCTTACTCGTACGGATCTCTC   | AACACCAGTAGAGTCTCTTGCTCCAGG    | 173              | <i>ASKα</i> gene expression                                    |
| <i>ASKη</i>       | CTCTATCGCCACAATGATCATTACCAA    | ATCATCAGCCATGGCGATAGAGAC       | 127              | <i>ASKη</i> gene expression                                    |
| <i>ASKγ</i>       | CGAAA ACTAGAGCAAAGCAGTCGAGA    | GTGAATCATTGTGGGGGTTATGATATT    | 163              | <i>ASKγ</i> gene expression                                    |
| <i>ASKε</i>       | ATTGGGGTCCGCTCTCTCTCTCT        | ACTAGAGAAGCCCTAGAATAAAACACTTCC | 131              | <i>ASKε</i> gene expression                                    |
| <i>ASKκ</i>       | CAAAGAAGGTGTGAAGAAGTTGGGAAA    | CCAAAGTCAAGCATTGACGATTGTC      | 174              | <i>ASKκ</i> gene expression                                    |
| <i>ASKι</i>       | AGCGATCTCGAGATGCTTTTCCAG       | TGGCCACGTCTAAGGAGGAGACATC      | 131              | <i>ASKι</i> gene expression                                    |
| <i>ASKζ</i>       | GTTAGAGCTGTA AAAAGCACATGACTTCG | CGGGACGACGTTTCAAAGAATCT        | 113              | <i>ASKζ</i> gene expression                                    |
| <i>ASKδ</i>       | CTCTACTGATCAGTTTCTCTCCATTGGTG  | TCTTATAGCTTGAACATCCACAAGCACT   | 209              | <i>ASKδ</i> gene expression                                    |
| <i>At Actin7</i>  | AGTGGTTCGTACAACCGGTATTGT       | GAGGATAGCATGTGGA ACTGAGAA      | 96               | Internal control                                               |



**Supplementary Table 2.** The orthologue relationship between ASKs and BrASKs. The calculation was carried out using InParanoid Version 4.1 (Sonnhammer and Östlund, 2015). The relationship between *ASKβ* and *BrASKβ* has been shown in red color.

| OrtoID | Score | <i>Arabidopsis</i> | <i>Brassica rapa</i> |
|--------|-------|--------------------|----------------------|
| 1      | 872   | AT4G00720          | Bra037354            |
| 2      | 818   | AT1G09840          | Bra030803            |
| 3      | 816   | AT3G05840          | Bra001169; Bra039407 |
| 4      | 812   | AT3G61160          | Bra003440            |
| 5      | 808   | AT5G14640          | Bra006263            |
| 6      | 801   | AT5G26751          | Bra036593            |
| 7      | 782   | AT2G30980          | Bra021685            |
| 8      | 771   | AT4G18710          | Bra020994            |

10 sequences in file At  
 18 sequences in file Br  
 10 sequences At have homologs in dataset Br  
 18 sequences Br have homologs in dataset At  
 80 At-At matches  
 144 Br-Br matches

#####

8 groups of orthologs

8 in-paralogs from At

9 in-paralogs from Br

Grey zone 0 bits

Score cutoff 40 bits

In-paralogs with confidence less than 0.05 not shown

Sequence overlap cutoff 0.5

Group merging cutoff 0.5

Scoring matrix BLOSUM62

#####

Group of orthologs #1. Best score 872 bits

Score difference with first non-orthologous sequence - At:266 Br:29

|           |         |           |         |
|-----------|---------|-----------|---------|
| AT4G00720 | 100.00% | Bra037354 | 100.00% |
|-----------|---------|-----------|---------|

Bootstrap support for AT4G00720 as seed ortholog is 100%.

Bootstrap support for Bra037354 as seed ortholog is 82%.

Group of orthologs #2. Best score 818 bits

Score difference with first non-orthologous sequence - At:29 Br:3

|           |         |           |         |
|-----------|---------|-----------|---------|
| AT1G09840 | 100.00% | Bra030803 | 100.00% |
|-----------|---------|-----------|---------|

Bootstrap support for AT1G09840 as seed ortholog is 90%.

Bootstrap support for Bra030803 as seed ortholog is 56%. Alternative seed ortholog is Bra019983 (3 bits away from this cluster)

Group of orthologs #3. Best score 816 bits

Score difference with first non-orthologous sequence - At:182 Br:35

|           |         |           |         |
|-----------|---------|-----------|---------|
| AT3G05840 | 100.00% | Bra001169 | 100.00% |
|           |         | Bra039407 | 10.34%  |

Bootstrap support for AT3G05840 as seed ortholog is 100%.

Bootstrap support for Bra001169 as seed ortholog is 94%.

Group of orthologs #4. Best score 812 bits

Score difference with first non-orthologous sequence - At:248 Br:18

|           |         |           |         |
|-----------|---------|-----------|---------|
| AT3G61160 | 100.00% | Bra003440 | 100.00% |
|-----------|---------|-----------|---------|

Bootstrap support for AT3G61160 as seed ortholog is 100%.

Bootstrap support for Bra003440 as seed ortholog is 41%. Alternative seed ortholog is Bra007577 (18 bits away from this cluster)

Group of orthologs #5. Best score 808 bits

Score difference with first non-orthologous sequence - At:163 Br:84

|           |         |           |         |
|-----------|---------|-----------|---------|
| AT5G14640 | 100.00% | Bra006263 | 100.00% |
|-----------|---------|-----------|---------|

Bootstrap support for AT5G14640 as seed ortholog is 100%.

Bootstrap support for Bra006263 as seed ortholog is 99%.

Group of orthologs #6. Best score 801 bits

Score difference with first non-orthologous sequence - At:172 Br:4

|           |         |           |         |
|-----------|---------|-----------|---------|
| AT5G26751 | 100.00% | Bra036593 | 100.00% |
|-----------|---------|-----------|---------|

Bootstrap support for AT5G26751 as seed ortholog is 100%.

Bootstrap support for Bra036593 as seed ortholog is 56%. Alternative seed ortholog is Bra009916 (4 bits away from this cluster)

Group of orthologs #7. Best score 782 bits

Score difference with first non-orthologous sequence - At:18 Br:92

|           |         |           |         |
|-----------|---------|-----------|---------|
| AT2G30980 | 100.00% | Bra021685 | 100.00% |
|-----------|---------|-----------|---------|

Bootstrap support for AT2G30980 as seed ortholog is 78%.

Bootstrap support for Bra021685 as seed ortholog is 99%.

Group of orthologs #8. Best score 771 bits

Score difference with first non-orthologous sequence - At:86 Br:5

|           |         |           |         |
|-----------|---------|-----------|---------|
| AT4G18710 | 100.00% | Bra020994 | 100.00% |
|-----------|---------|-----------|---------|

Bootstrap support for AT4G18710 as seed ortholog is 100%.

Bootstrap support for Bra020994 as seed ortholog is 61%. Alternative seed ortholog is Bra013341 (5 bits away from this cluster)

Supplementary Table S3. ASKβ co-expressed genes selected using Expression Angler.

| UNIQUID   | R-value to Bait | Annotation                                                                  | GeneChip-ID |
|-----------|-----------------|-----------------------------------------------------------------------------|-------------|
| A13g01160 | 1.0000          | Protein kinase superfamily protein                                          | 251358_at   |
| A12g45800 | 0.9910          | PLIM2b_GATA type zinc finger transcription factor family protein            | 266915_at   |
| A12g45400 | 0.9910          | Pleckstrin homology (PH) and lipid-binding START domains-containing protein | 251854_at   |
| A11g13970 | 0.9910          | Protein of unknown function (DUF1336)                                       | 262664_at   |
| A12g62180 | 0.9900          | Plant invertase/pectin methylesterase inhibitor superfamily protein         | 251250_at   |
| A13g04700 | 0.9890          | Protein of unknown function (DUF1685)                                       | 257532_at   |
| A12g25165 | 0.9870          | RALFL25_ralf-like 25                                                        | 257819_at   |
| A12g50030 | 0.9870          | Plant invertase/pectin methylesterase inhibitor superfamily protein         | 248534_at   |
| A13g01240 | 0.9870          | unknown protein                                                             | 259266_at   |
| A12g16500 | 0.9860          | Protein kinase superfamily protein                                          | 250121_at   |
| A12g13350 | 0.9860          | Calcium-dependent lipid-binding (CaLB domain) family protein                | 265368_at   |
| A12g48140 | 0.9840          | Pectin lyase-like superfamily protein                                       | 248714_at   |
| A12g43120 | 0.9840          | SAUR-like auxin-responsive protein family                                   | 252733_at   |
| A12g15110 | 0.9830          | Pectate lyase family protein                                                | 246545_at   |
| A12g20210 | 0.9830          | DELTA-VPE_DELTA_VAPE_delta vacuolar processing enzyme                       | 257121_at   |
| A12g21180 | 0.9830          | ACA9_ATACA9_autoinhibited Ca(2+)-ATPase 9                                   | 258035_at   |
| A11g01780 | 0.9830          | PLIM2b_GATA type zinc finger transcription factor family protein            | 261559_at   |
| A12g15600 | 0.9820          | SP1L4_SPIRAL1-like4                                                         | 246540_at   |
| A12g20410 | 0.9810          | ATMGD2_MGD2_monogalactosyldiacylglycerol synthase 2                         | 246075_at   |
| A12g31500 | 0.9810          | CPK24_calcium-dependent protein kinase 24                                   | 263450_at   |
| A11g68110 | 0.9810          | ENTH/ANTH/VHS superfamily protein                                           | 260011_at   |
| A11g10770 | 0.9810          | Plant invertase/pectin methylesterase inhibitor superfamily protein         | 262760_at   |
| A12g26110 | 0.9810          | Anther-specific protein agp1-like                                           | 258077_at   |
| A12g26700 | 0.9800          | RmC-like cupins superfamily protein                                         | 246841_at   |
| A12g18220 | 0.9800          | Phosphatidic acid phosphatase (PAP2) family protein                         | 257065_at   |
| 263659_at | 0.9800          |                                                                             | 263659_at   |
| A12g12000 | 0.9790          | Protein kinase protein with adenine nucleotide alpha hydrolases-like domain | 250349_at   |
| A12g20320 | 0.9790          | DENN (AEX-3) domain-containing protein                                      | 265306_at   |
| A12g01700 | 0.9780          | AGP11_ATAGP11_arabinogalactan protein 11                                    | 259189_at   |
| A12g46770 | 0.9780          | unknown protein                                                             | 248840_at   |
| A12g02140 | 0.9780          | LCR72_PDF2_6_low-molecular-weight cysteine-rich 72                          | 266115_at   |
| A11g24520 | 0.9770          | BCP1_homolog of Brassica campestris pollen protein 1                        | 265022_at   |
| A12g28150 | 0.9770          | AXY4L_TBL22_TRICHOME BIREFRINGENCE-LIKE 22                                  | 257309_at   |
| A12g36490 | 0.9770          | ATSFH12_SFH12_SEC14-like 12                                                 | 246208_at   |
| A12g25170 | 0.9770          | RALFL26_ralf-like 26                                                        | 257821_at   |
| A12g26060 | 0.9760          | Plant self-incompatibility protein S1 family                                | 246878_at   |
| A12g20865 | 0.9760          | AGP40_arabinogalactan protein 40                                            | 257986_at   |
| A11g18990 | 0.9760          | Protein of unknown function, DUF593                                         | 259464_at   |
| A12g14380 | 0.9760          | AGP6_arabinogalactan protein 6                                              | 250174_at   |
| A12g27180 | 0.9760          | unknown protein                                                             | 263084_at   |
| A12g47000 | 0.9750          | Peroxidase superfamily protein                                              | 248822_at   |
| A12g17980 | 0.9750          | AtC2_C2_Calcium-dependent lipid-binding (CaLB domain) family protein        | 258216_at   |
| A12g50830 | 0.9750          | unknown protein                                                             | 248470_at   |
| A12g02250 | 0.9750          | Plant invertase/pectin methylesterase inhibitor superfamily protein         | 255515_at   |
| A12g26860 | 0.9750          | Plant self-incompatibility protein S1 family                                | 258278_at   |
| A12g04180 | 0.9750          | ACA3_ATACA3_alpha carbonic anhydrase 3                                      | 245700_at   |
| A12g15140 | 0.9740          | Galactose mutarotase-like superfamily protein                               | 250154_at   |
| A12g34220 | 0.9740          | Protein of unknown function (DUF810)                                        | 255835_at   |
| A12g45280 | 0.9740          | ATSYYP2_SYPP2_syntaxin of plants 72                                         | 252571_at   |
| A12g44560 | 0.9740          | FLA3_FASCLIN-like arabinogalactan protein 3 precursor                       | 257392_at   |
| A12g64790 | 0.9740          | O-Glycosyl hydrolases family 17 protein                                     | 247253_at   |
| A12g47050 | 0.9740          | Plant invertase/pectin methylesterase inhibitor superfamily protein         | 266764_at   |
| A12g62710 | 0.9740          | Glycosyl hydrolase family protein                                           | 251228_at   |
| A12g62640 | 0.9730          | Protein of unknown function (DUF3511)                                       | 251180_at   |
| A12g05610 | 0.9730          | Plant invertase/pectin methylesterase inhibitor superfamily                 | 258889_at   |
| A11g54070 | 0.9730          | Dormancy/auxin associated family protein                                    | 263144_at   |
| A12g02720 | 0.9730          | Pectate lyase family protein                                                | 267476_at   |
| A12g28750 | 0.9730          | unknown protein                                                             | 256584_at   |
| A12g27790 | 0.9720          | Calcium-binding EF hand family protein                                      | 253833_at   |
| A12g34440 | 0.9720          | AtPERK5_PERK5_Protein kinase superfamily protein                            | 253262_at   |
| A11g70790 | 0.9720          | Calcium-dependent lipid-binding (CaLB domain) family protein                | 262291_at   |
| A12g55930 | 0.9720          | ATOPT1_OPT1_oligopeptide transporter 1                                      | 248037_at   |
| A12g26260 | 0.9720          | MIOX4_myo-inositol oxygenase 4                                              | 254001_at   |
| A12g04930 | 0.9710          | DES-1-LIKE_fatty acid desaturase family protein                             | 255276_at   |
| A12g24370 | 0.9710          | Protein kinase protein with adenine nucleotide alpha hydrolases-like domain | 265681_at   |
| A11g73860 | 0.9710          | P-loop containing nucleoside triphosphate hydrolases superfamily protein    | 260381_at   |
| A11g14420 | 0.9710          | ATS9_Pectate lyase family protein                                           | 261528_at   |
| A12g02810 | 0.9710          | Protein kinase superfamily protein                                          | 258600_at   |
| A11g52580 | 0.9700          | ATRBL5_RBL5_RHOMBOLD-like protein 5                                         | 262146_at   |
| A12g06260 | 0.9700          | GATL4_GoIS9_galacturonosyltransferase-like 4                                | 256392_at   |
| A12g47540 | 0.9700          | Mo25 family protein                                                         | 248751_at   |
| A12g51290 | 0.9700          | Protein of unknown function (DUF630);Protein of unknown function (DUF632)   | 252101_at   |
| A11g78460 | 0.9700          | SOUL_heme-binding family protein                                            | 263126_at   |
| A12g36020 | 0.9690          | HVA22J_HVA22-like protein J                                                 | 263950_at   |
| A12g07820 | 0.9690          | Pectin lyase-like superfamily protein                                       | 258639_at   |
| A11g52240 | 0.9680          | ATROPGEF11_PIRF1_ROPGEF11_RHO guanyl-nucleotide exchange factor 11          | 257504_at   |
| A12g42640 | 0.9680          | AHA8_HA8_H(+)-ATPase 8                                                      | 252820_at   |
| A11g69940 | 0.9680          | ATPPME1_PPME1_Pectin lyase-like superfamily protein                         | 250606_s_   |
| A12g58050 | 0.9680          | GDPDL6_SVL4_SHV3-like 4                                                     | 247843_at   |
| A12g01270 | 0.9670          | Pectate lyase family protein                                                | 259269_at   |
| A12g39880 | 0.9670          | unknown protein                                                             | 249429_at   |
| A12g05930 | 0.9670          | GLP8_germin-like protein 8                                                  | 258748_at   |
| A12g61720 | 0.9670          | Protein of unknown function (DUF1216)                                       | 247512_at   |
| A12g62170 | 0.9670          | VGDH2_VANGUARD 1 homolog 2                                                  | 251258_at   |
| A12g01610 | 0.9670          | Protein of unknown function, DUF538                                         | 251107_at   |
| A12g05330 | 0.9670          | AGD13_ARF-GAP domain 13                                                     | 255232_at   |
| A12g35010 | 0.9660          | BGAL11_beta-galactosidase 11                                                | 253226_at   |
| A12g55560 | 0.9660          | sks14_SKU5_similar 14                                                       | 265127_at   |
| A12g02970 | 0.9660          | EXL6_EXORDIUM like 6                                                        | 258605_at   |
| A11g04700 | 0.9660          | PBI domain-containing protein tyrosine kinase                               | 264602_at   |
| A12g46210 | 0.9660          | AtSLD2_SLD2_Fatty acid/sphingolipid desaturase                              | 266592_at   |
| A11g24620 | 0.9650          | EF hand calcium-binding protein family                                      | 257405_at   |
| A12g37990 | 0.9650          | AGL18_AGAMOUS-like 18                                                       | 251623_at   |
| A12g28810 | 0.9650          | Protein of unknown function (DUF1216)                                       | 256580_s_   |
| A12g03800 | 0.9650          | ATSYYP13_SYYP13_syntaxin of plants 131                                      | 259338_at   |
| A12g42880 | 0.9650          | Leucine-rich repeat protein kinase family protein                           | 252771_at   |
| A12g20580 | 0.9640          | COBL10_COBLA-like protein 10 precursor                                      | 257082_at   |
| A12g16730 | 0.9640          | BGAL13_glycosyl hydrolase family 35 protein                                 | 265404_at   |
| A12g62230 | 0.9640          | DAF1_F-box family protein                                                   | 251252_at   |
| A12g10660 | 0.9640          | calmodulin-binding protein-related                                          | 246013_at   |
| A12g19310 | 0.9640          | PLC-like phosphodiesterases superfamily protein                             | 258012_at   |
| A12g40990 | 0.9640          | DHHC-type zinc finger family protein                                        | 257358_at   |
| A12g13065 | 0.9640          | SRF4_STRUBBELIG-receptor family 4                                           | 257850_at   |
| A12g21570 | 0.9640          | unknown protein                                                             | 258168_at   |
| A12g07430 | 0.9640          | Pectin lyase-like superfamily protein                                       | 250631_at   |

|                  |        |                                                                               |           |
|------------------|--------|-------------------------------------------------------------------------------|-----------|
| <i>At2g43230</i> | 0.9630 | Protein kinase superfamily protein]                                           | 266453_at |
| <i>At4g35180</i> | 0.9630 | LHT7_LYS/HIS transporter 7]                                                   | 253181_at |
| <i>At1g35490</i> | 0.9630 | bZIP family transcription factor]                                             | 262022_at |
| <i>At4g27580</i> | 0.9630 | unknown protein                                                               | 253831_at |
| <i>At2g20700</i> | 0.9620 | LLG2_LORELEI-LIKE-GPI ANCHORED PROTEIN 2]                                     | 265430_at |
| <i>At4g30140</i> | 0.9620 | CDEF1_GDSL-like Lipase/Acylhydrolase superfamily protein]                     | 253660_at |
| <i>At1g25240</i> | 0.9620 | ENTH/VHS/GAT family protein]                                                  | 245636_at |
| <i>At3g13390</i> | 0.9620 | sks11_SKU5 similar 11]                                                        | 256955_at |
| <i>At1g76370</i> | 0.9610 | Protein kinase superfamily protein]                                           | 259886_at |
| <i>At5g56640</i> | 0.9610 | MIOX5_myoinositol oxygenase 5]                                                | 247981_at |
| <i>At5g23270</i> | 0.9610 | ATSTP11_STP11_sugar transporter 11]                                           | 249852_at |
| <i>At1g74000</i> | 0.9610 | SS3_strictosidine synthase 3]                                                 | 260335_at |
| <i>At5g7620</i>  | 0.9600 | RNA-binding (RRM/RBD/RNP motifs) family protein]                              | 248755_at |
| <i>At1g55370</i> | 0.9600 | sks12_SKU5 similar 12]                                                        | 265080_at |
| <i>At1g91290</i> | 0.9600 | ATSYPI24_SYPI24_syntaxin of plants 124]                                       | 264760_at |
| <i>At4g39110</i> | 0.9600 | Malectin/receptor-like protein kinase family protein]                         | 252933_at |
| <i>At3g01620</i> | 0.9590 | beta-1,4-N-acetylglucosaminyltransferase family protein]                      | 257523_at |
| <i>At1g04540</i> | 0.9590 | Calcium-dependent lipid-binding (CaLB domain) family protein]                 | 264601_at |
| <i>At5g19580</i> | 0.9590 | glyoxal oxidase-related protein]                                              | 245946_at |
| <i>At4g24640</i> | 0.9590 | APPB1_Plant invertase/pectin methyltransferase inhibitor superfamily protein] | 254123_at |
| <i>At3g20530</i> | 0.9590 | Protein kinase superfamily protein]                                           | 257090_at |
| <i>At1g29140</i> | 0.9590 | Pollen Ole e 1 allergen and extensin family protein]                          | 260888_at |
| <i>At5g64510</i> | 0.9580 | TIN1_unknown protein                                                          | 247293_at |
| <i>At4g28280</i> | 0.9580 | LLG3_LORELEI-LIKE-GPI ANCHORED PROTEIN 3]                                     | 253807_at |
| <i>At2g33460</i> | 0.9570 | RIC1_ROP-interactive CRIB motif-containing protein 1]                         | 255837_at |
| <i>At3g16040</i> | 0.9570 | Translation machinery associated TMA7]                                        | 258337_at |
| <i>At2g46360</i> | 0.9570 | unknown protein                                                               | 263781_at |
| <i>At4g25780</i> | 0.9570 | CAP (Cysteine-rich secretory proteins) superfamily protein]                   | 254024_at |
| <i>At2g18180</i> | 0.9570 | Sec14p-like phosphatidylinositol transfer family protein]                     | 263062_at |
| <i>At5g24240</i> | 0.9560 | Phosphatidylinositol 3- and 4-kinase (Ubiquitin family protein]               | 249780_at |
| <i>At5g39420</i> | 0.9560 | cdc2cAt_CDC2C]                                                                | 249448_at |
| <i>At5g18910</i> | 0.9560 | Protein kinase superfamily protein]                                           | 249950_at |
| <i>At3g17060</i> | 0.9560 | Pectin lyase-like superfamily protein]                                        | 257886_at |
| <i>At2g26410</i> | 0.9560 | lq4_IQ-domain 4]                                                              | 245036_at |
| <i>At2g18470</i> | 0.9560 | AtPERK4_PERK4_rolin-rich extensin-like receptor kinase 4]                     | 265923_at |
| <i>At3g20190</i> | 0.9560 | Leucine-rich repeat protein kinase family protein]                            | 257119_at |
| <i>At4g07960</i> | 0.9560 | ATCSLC12_CSLC12_CSLC12_Cellulose-synthase-like C12]                           | 255175_at |
| <i>At2g36450</i> | 0.9550 | Plant invertase/pectin methyltransferase inhibitor superfamily]               | 245053_at |
| <i>At5g62750</i> | 0.9550 | unknown protein                                                               | 247402_at |
| <i>At2g07040</i> | 0.9550 | ATPRK2A_PRK2A_Leucine-rich repeat protein kinase family protein]              | 266494_at |
| <i>At1g02790</i> | 0.9550 | PGA4_polygalacturonase 4]                                                     | 262122_at |
| <i>At2g33870</i> | 0.9550 | ArRABA1h_RAB GTPase homolog A1H]                                              | 267447_at |
| <i>At5g27980</i> | 0.9550 | Seed maturation protein]                                                      | 246761_at |
| <i>At2g26490</i> | 0.9550 | Transducin/WD40 repeat-like superfamily protein]                              | 245057_at |
| <i>At1g10660</i> | 0.9550 | unknown protein                                                               | 257477_at |
| <i>At4g39610</i> | 0.9550 | Protein of unknown function, DUF617]                                          | 252881_at |
| <i>At1g17540</i> | 0.9550 | Protein kinase protein with adenine nucleotide alpha hydrolases-like domain]  | 260737_at |
| <i>At3g56600</i> | 0.9540 | Protein kinase superfamily protein]                                           | 251697_at |
| <i>At1g66210</i> | 0.9540 | Subtilisin-like serine endopeptidase family protein]                          | 259820_at |
| <i>At3g52600</i> | 0.9540 | AtcwINV2_CWINV2_cell wall invertase 2]                                        | 252052_at |
| <i>At5g61980</i> | 0.9540 | AGD1_ARF-GAP domain 1]                                                        | 247503_at |
| <i>At2g33100</i> | 0.9530 | ATCSLD1_CSLD1_CSLD1_cellulose synthase-like D1]                               | 245159_at |
| <i>At1g47280</i> | 0.9530 | unknown protein                                                               | 261687_at |
| <i>At5g57690</i> | 0.9530 | ATDGK4_DGK4_diaclyglycerol kinase 4]                                          | 247873_at |
| <i>At2g26850</i> | 0.9530 | F-box family protein]                                                         | 266850_at |
| <i>At2g32460</i> | 0.9530 | ATM1_ATMYB101_MYB101_myb domain protein 101]                                  | 267087_at |
| <i>At1g19500</i> | 0.9530 | unknown protein                                                               | 260661_at |
| <i>At3g13400</i> | 0.9530 | sks13_SKU5 similar 13]                                                        | 256966_at |
| <i>At1g28270</i> | 0.9520 | RALFL4_raf-like 4]                                                            | 245658_at |
| <i>At1g64628</i> | 0.9520 | CPuORF57_conserved peptide upstream open reading frame 57]                    | 261974_at |
| <i>At2g21990</i> | 0.9520 | Protein of unknown function, DUF617]                                          | 257433_at |
| <i>At1g30550</i> | 0.9510 | ENTH/ANTH/VHS superfamily protein]                                            | 263166_at |
| <i>At3g09530</i> | 0.9510 | ATEX070H3_EXO70H3_exocyst subunit exo70 family protein H3]                    | 258753_at |
| <i>At5g45880</i> | 0.9510 | Pollen Ole e 1 allergen and extensin family protein]                          | 248926_at |
| <i>At5g56750</i> | 0.9510 | NDL1_N-MYC downregulated-like 1]                                              | 247979_at |
| <i>At4g10010</i> | 0.9500 | Protein kinase superfamily protein]                                           | 255006_at |
| <i>At1g49490</i> | 0.9500 | Leucine-rich repeat (LRR) family protein]                                     | 262393_at |
| <i>At2g23900</i> | 0.9500 | Pectin lyase-like superfamily protein]                                        | 266558_at |
| <i>At1g70540</i> | 0.9500 | EDA24_Plant invertase/pectin methyltransferase inhibitor superfamily protein] | 260306_at |
| <i>At2g03410</i> | 0.9500 | Mo25 family protein]                                                          | 265705_at |
| <i>At3g06830</i> | 0.9500 | Plant invertase/pectin methyltransferase inhibitor superfamily]               | 258523_at |
| <i>At1g01460</i> | 0.9490 | ATPIPK11_PIPK11_Phosphatidylinositol-4-phosphate 5-kinase, core]              | 259425_at |
| <i>At4g24580</i> | 0.9490 | REN1_Rho GTPase activation protein (RhoGAP) with PH domain]                   | 254173_at |
| <i>At4g04980</i> | 0.9490 | unknown protein                                                               | 255251_at |
| <i>At3g43860</i> | 0.9490 | AtGH9A4_GH9A4_glycosyl hydrolase 9A4]                                         | 252710_at |
| <i>At5g14890</i> | 0.9490 | NHL domain-containing protein]                                                | 246592_at |
| <i>At3g61230</i> | 0.9480 | PLIM2c_GATA type zinc finger transcription factor family protein]             | 251361_at |
| <i>At1g15350</i> | 0.9480 | unknown protein                                                               | 262599_at |
| <i>At2g46260</i> | 0.9480 | BTB/POZ/Kelch-associated protein]                                             | 266580_at |
| <i>At5g59370</i> | 0.9480 | ACT4_actin 4]                                                                 | 247736_at |
| <i>At1g01310</i> | 0.9480 | CAP (Cysteine-rich secretory proteins) superfamily protein]                   | 261045_at |
| <i>At1g10740</i> | 0.9480 | alpha/beta-Hydrolases superfamily protein]                                    | 262786_at |
| <i>At4g03620</i> | 0.9470 | myosin heavy chain-related]                                                   | 255386_at |
| <i>At2g44560</i> | 0.9470 | AtGH9B11_GH9B11_glycosyl hydrolase 9B11]                                      | 267398_at |
| <i>At2g02020</i> | 0.9470 | Protein kinase protein with adenine nucleotide alpha hydrolases-like domain]  | 257120_at |
| <i>At3g01040</i> | 0.9470 | GALT13_galacturonosyltransferase 13]                                          | 259321_at |
| <i>At2g23540</i> | 0.9470 | AtPERK12_IG11_PERK12_Protein kinase superfamily protein]                      | 265178_at |
| <i>At1g69050</i> | 0.9470 | unknown protein                                                               | 259370_at |
| <i>At3g19020</i> | 0.9460 | Leucine-rich repeat (LRR) family protein]                                     | 256945_at |
| <i>At1g50610</i> | 0.9460 | Leucine-rich repeat protein kinase family protein]                            | 261875_at |
| <i>At5g54095</i> | 0.9460 | unknown protein                                                               | 248194_at |
| <i>At2g22180</i> | 0.9450 | hydroxyproline-rich glycoprotein family protein]                              | 263453_at |
| <i>At3g21700</i> | 0.9450 | ATSGP2_SGP2_Ras-related small GTP-binding family protein]                     | 257951_at |
| <i>At5g35090</i> | 0.9450 | unknown protein                                                               | 246646_at |
| <i>At2g02970</i> | 0.9450 | GDA1/CD39 nucleoside phosphatase family protein]                              | 266744_at |
| <i>At1g79860</i> | 0.9450 | ATROPGEF12_MEE64_ROPGEF12_RHO guanyl-nucleotide exchange factor 12]           | 260161_at |
| <i>At3g29060</i> | 0.9450 | EXS (ERD1/XPR1/SYG1) family protein]                                          | 257106_at |
| <i>At5g42490</i> | 0.9450 | ATP binding microtubule motor family protein]                                 | 249194_at |
| <i>At3g29180</i> | 0.9450 | Protein of unknown function (DUF1336)]                                        | 256747_at |
| <i>At1g01980</i> | 0.9440 | FAD-binding Berberine family protein]                                         | 261623_at |
| <i>At3g22750</i> | 0.9440 | Protein kinase superfamily protein]                                           | 258323_at |
| <i>At3g24715</i> | 0.9440 | Protein kinase superfamily protein with octicosapeptide/Phox/Bem1p domain]    | 257618_at |
| <i>At2g07180</i> | 0.9440 | Protein kinase superfamily protein]                                           | 266428_at |
| <i>At5g16540</i> | 0.9440 | ZFN3_zinc finger nuclease 3]                                                  | 250128_at |
| <i>At1g79910</i> | 0.9430 | Regulator of Vps4 activity in the MVB pathway protein]                        | 260158_at |
| <i>At1g31240</i> | 0.9430 | Plant self-incompatibility protein S1 family]                                 | 265133_s_ |
| <i>At1g64300</i> | 0.9430 | Protein kinase family protein]                                                | 259740_at |
| <i>At3g7980</i>  | 0.9430 | O-fucosyltransferase family protein]                                          | 266100_at |
| <i>At5g42340</i> | 0.9430 | PUB15_Plant U-Box 15]                                                         | 249250_at |
| <i>At4g27350</i> | 0.9430 | Protein of unknown function (DUF1223)]                                        | 253919_at |
| <i>At4g20890</i> | 0.9420 | TUB9_tubulin beta-9 chain]                                                    | 254446_at |
| <i>At2g41860</i> | 0.9420 | CPK14_calcium-dependent protein kinase 14]                                    | 267531_at |
| <i>At1g67290</i> | 0.9420 | GLOX1_glyoxal oxidase-related protein]                                        | 264993_at |
| <i>At5g12950</i> | 0.9420 | Putative glycosyl hydrolase of unknown function (DUF1680)]                    | 250268_s_ |
| <i>At1g11770</i> | 0.9420 | FAD-binding Berberine family protein]                                         | 262817_at |
| <i>At1g67480</i> | 0.9420 | Galactose oxidase/kelch repeat superfamily protein]                           | 264229_at |
| <i>At1g23350</i> | 0.9420 | Plant invertase/pectin methyltransferase inhibitor superfamily protein]       | 263043_at |
| <i>At3g54240</i> | 0.9410 | alpha/beta-Hydrolases superfamily protein]                                    | 251874_at |
| <i>At1g64740</i> | 0.9410 | TUA1_alpha-1 tubulin]                                                         | 262885_at |
| <i>At3g59830</i> | 0.9410 | Integrin-linked protein kinase family]                                        | 251433_at |
| <i>At2g05850</i> | 0.9400 | scpl38_serine carboxypeptidase-like 38]                                       | 266029_at |
| <i>At1g61563</i> | 0.9390 | RALFL8_raf-like 8]                                                            | 265007_s_ |
| <i>At3g52000</i> | 0.9390 | scpl36_serine carboxypeptidase-like 36]                                       | 252085_s_ |
| <i>At4g03290</i> | 0.9380 | EF hand calcium-binding protein family]                                       | 255423_at |
| <i>At1g61860</i> | 0.9380 | Protein kinase superfamily protein]                                           | 264284_at |
| <i>At3g28830</i> | 0.9380 | Protein of unknown function (DUF1216)]                                        | 256581_at |
| <i>At1g78940</i> | 0.9380 | Protein kinase protein with adenine nucleotide alpha hydrolases-like domain]  | 264139_at |

|                  |        |                                                                              |           |
|------------------|--------|------------------------------------------------------------------------------|-----------|
| <i>A15g20390</i> | 0.9380 | Glycosyl hydrolase superfamily protein]                                      | 246123_at |
| <i>A1g28550</i>  | 0.9380 | AtRABA1i_RABA1i__RAB GTPase homolog A11]                                     | 262742_at |
| <i>A15g58170</i> | 0.9370 | GDPLD7_SVL5__SHV3-like 5]                                                    | 247804_at |
| <i>A13g07880</i> | 0.9370 | SCN1__Immunoglobulin E-set superfamily protein]                              | 258637_at |
| <i>A15g13990</i> | 0.9370 | ATEX070C2_EXO70C2__exocyst subunit exo70 family protein C2]                  | 250204_at |
| <i>A1g13890</i>  | 0.9360 | SNAP30__soluble N-ethylmaleimide-sensitive factor adaptor protein 30]        | 259451_at |
| <i>A13g11690</i> | 0.9360 | unknown protein                                                              | 259103_at |
| <i>A1g63930</i>  | 0.9360 | ROH1__from the Czech 'roh' meaning 'corner']                                 | 260320_at |
| <i>A15g65530</i> | 0.9360 | Protein kinase superfamily protein]                                          | 247170_at |
| <i>A12g21540</i> | 0.9360 | ATSFH3_SFHH3__SEC14-like 3]                                                  | 263765_at |
| <i>A15g60740</i> | 0.9360 | ABCG28__ABC transporter family protein]                                      | 247613_at |
| <i>A1g06700</i>  | 0.9360 | Protein kinase superfamily protein]                                          | 260835_at |
| <i>A12g28640</i> | 0.9360 | ATEX070H5_EXO70H5__exocyst subunit exo70 family protein H5]                  | 263440_at |
| <i>A1g13640</i>  | 0.9360 | MRH1__Leucine-rich repeat protein kinase family protein]                     | 254633_at |
| <i>A1g54280</i>  | 0.9360 | ATPase E1-E2 type family protein]                                            | 262998_at |
| <i>A1g30710</i>  | 0.9350 | FAD-binding Berberine family protein]                                        | 263215_at |
| <i>A15g26150</i> | 0.9350 | protein kinase family protein]                                               | 246877_at |
| <i>A13g05150</i> | 0.9350 | Major facilitator superfamily protein]                                       | 259351_at |
| <i>A1g60740</i>  | 0.9350 | ] Thioredoxin superfamily protein]                                           | 264923_s_ |
| <i>A15g58380</i> | 0.9350 | CIPK10_PKS2_SIP1_SNRK3.8__SOS3-interacting protein 1]                        | 247820_at |
| <i>A15g41780</i> | 0.9350 | myosin heavy chain-related]                                                  | 249270_at |
| <i>A15g39400</i> | 0.9350 | ATPTEN1_PTEN1__Calcium/lipid-binding (CaLB) phosphatase]                     | 249447_at |
| <i>A12g47030</i> | 0.9350 | ] VGDH1__Plant invertase/pectin methyltransferase inhibitor superfamily]     | 266750_s_ |
| <i>A12g17890</i> | 0.9350 | CPK16__calcium-dependent protein kinase 16]                                  | 264813_at |
| <i>A4g25590</i>  | 0.9340 | ADF7__actin depolymerizing factor 7]                                         | 245232_at |
| <i>A13g47440</i> | 0.9340 | TIP5;1__tonoplast intrinsic protein 5;1]                                     | 252440_at |
| <i>A4g35700</i>  | 0.9340 | DAZ3__zinc finger (C2H2 type) family protein]                                | 253153_at |
| <i>A12g40620</i> | 0.9330 | Basic-leucine zipper (bZIP) transcription factor family protein]             | 255878_at |
| <i>A1g02000</i>  | 0.9330 | GAE2__UDP-D-glucuronate 4-epimerase 2]                                       | 261624_at |
| <i>A1g44120</i>  | 0.9330 | Armadillo/beta-catenin-like repeat                                           | 245741_at |
| <i>A4g24630</i>  | 0.9320 | DHHC-type zinc finger family protein]                                        | 254142_at |
| <i>A15g07420</i> | 0.9320 | Pectin lyase-like superfamily protein]                                       | 250608_at |
| <i>A15g10260</i> | 0.9320 | AtRABH1e_RABH1e__RAB GTPase homolog H1E]                                     | 250479_at |
| <i>A4g13240</i>  | 0.9320 | ATROPGEF9_ROPGEF9__RHO guanyl-nucleotide exchange factor 9]                  | 254757_at |
| <i>A13g12620</i> | 0.9310 | Protein phosphatase 2C family protein]                                       | 256279_at |
| <i>A13g07960</i> | 0.9310 | PIPSK6__Phosphatidylinositol-4-phosphate 5-kinase family protein]            | 258690_at |
| <i>A1g12450</i>  | 0.9310 | SNARE associated Golgi protein family]                                       | 259530_at |
| <i>A1g01575</i>  | 0.9310 | serine protease inhibitor, Kazal-type family protein]                        | 255536_at |
| <i>A12g38180</i> | 0.9310 | ATCHX8_CHX08_CHX8__Cation/hydrogen exchanger family protein]                 | 266160_at |
| <i>A12g39890</i> | 0.9310 | ATPROT1_PROT1__proline transporter 1]                                        | 267358_at |
| <i>A15g09430</i> | 0.9300 | alpha/beta-Hydrolases superfamily protein]                                   | 245880_at |
| <i>A12g31830</i> | 0.9300 | endonuclease/exonuclease/phosphatase family protein]                         | 263489_at |
| <i>A13g18750</i> | 0.9300 | ATWNK6_WNK6_ZIK5__with no lysine (K) kinase 6]                               | 257801_at |
| <i>A13g59290</i> | 0.9290 | ENTH/VHS family protein]                                                     | 251468_at |
| <i>A15g01700</i> | 0.9290 | Protein phosphatase 2C family protein]                                       | 251103_at |
| <i>A12g47340</i> | 0.9290 | Plant invertase/pectin methyltransferase inhibitor superfamily protein]      | 260577_at |
| <i>A12g34440</i> | 0.9290 | AGL29__AGAMOUS-like 29]                                                      | 266994_at |
| <i>A15g61360</i> | 0.9290 | unknown protein                                                              | 247547_at |
| <i>A15g36260</i> | 0.9280 | Eukaryotic aspartyl protease family protein]                                 | 246616_at |
| <i>A13g13660</i> | 0.9280 | Disease resistance-responsive (dirigent-like protein) family protein]        | 256782_at |
| <i>A13g19970</i> | 0.9270 | alpha/beta-Hydrolases superfamily protein]                                   | 256627_at |
| <i>A1g16760</i>  | 0.9270 | Protein kinase protein with adenine nucleotide alpha hydrolases-like domain] | 255765_at |
| <i>A4g38230</i>  | 0.9270 | ATCPK26_CPK26__calcium-dependent protein kinase 26]                          | 253034_at |
| <i>A13g07850</i> | 0.9260 | ] Pectin lyase-like superfamily protein]                                     | 258645_s_ |
| <i>A1g64320</i>  | 0.9260 | myosin heavy chain-related]                                                  | 257508_at |
| <i>A13g28790</i> | 0.9250 | Protein of unknown function (DUF1216)]                                       | 256588_at |
| <i>A13g02555</i> | 0.9250 | unknown protein                                                              | 258493_at |
| <i>A15g05070</i> | 0.9250 | DHHC-type zinc finger family protein]                                        | 250806_at |
| <i>A13g57140</i> | 0.9250 | SDP1-LIKE__sugar-dependent 1-like]                                           | 251654_at |
| <i>A1g44160</i>  | 0.9250 | HSP40/DnaJ peptide-binding protein]                                          | 245737_at |
| <i>A1g44170</i>  | 0.9240 | ATP binding microtubule motor family protein]                                | 254205_at |
| <i>A15g12180</i> | 0.9240 | CPK17__calcium-dependent protein kinase 17]                                  | 250308_at |
| <i>A12g46520</i> | 0.9240 | ACT12__actin-12]                                                             | 252531_at |
| <i>A1g58120</i>  | 0.9240 | unknown protein                                                              | 246392_at |
| <i>A15g52360</i> | 0.9240 | ADF10__actin depolymerizing factor 10]                                       | 248367_at |
| <i>A1g54290</i>  | 0.9230 | Translation initiation factor SUI1 family protein]                           | 262959_at |
| <i>A13g05820</i> | 0.9230 | A/N-Invh_H_At-A/N-Invh_H_INVH__invertase H]                                  | 258732_at |
| <i>A13g51770</i> | 0.9230 | ATEOL1_ETO1__tetratricopeptide repeat (TPR)-containing protein]              | 246298_at |
| <i>A15g28680</i> | 0.9230 | ANX2__Malectin/receptor-like protein kinase family protein]                  | 246106_at |
| <i>A15g12390</i> | 0.9220 | FIS1B__Tetratricopeptide repeat (TPR)-like superfamily protein]              | 245178_at |
| <i>A13g23170</i> | 0.9220 | unknown protein                                                              | 257925_at |
| <i>A13g57690</i> | 0.9220 | AGP23_ATAGP23__arabinogalactan protein 23]                                   | 251590_at |
| <i>A4g26400</i>  | 0.9220 | RING/U-box superfamily protein]                                              | 253958_at |
| <i>A15g25340</i> | 0.9220 | Ubiquitin-like superfamily protein]                                          | 246918_at |
| <i>A12g19770</i> | 0.9210 | PRF5__profilin 5]                                                            | 266697_at |
| <i>A15g13150</i> | 0.9210 | ATEX070C1_EXO70C1__exocyst subunit exo70 family protein C1]                  | 245979_at |
| <i>A15g27870</i> | 0.9210 | Plant invertase/pectin methyltransferase inhibitor superfamily]              | 246751_at |
| <i>A4g25900</i>  | 0.9210 | Galactose mutarotase-like superfamily protein]                               | 254040_at |
| <i>A15g54780</i> | 0.9210 | Ypt/Rab-GAP domain of gyp1p superfamily protein]                             | 248129_at |
| <i>A12g33320</i> | 0.9200 | Calcium-dependent lipid-binding (CaLB domain) family protein]                | 255849_at |
| <i>A4g18790</i>  | 0.9200 | ATNRAMP5_NRAMPS__NRAMP metal ion transporter family protein]                 | 254640_at |
| <i>263366_at</i> | 0.9190 | unknown protein                                                              | 263366_at |
| <i>A1g54920</i>  | 0.9190 | Protein of unknown function (DUF1216)]                                       | 256323_at |
| <i>A13g28980</i> | 0.9190 | unknown protein                                                              | 258058_at |
| <i>A1g75370</i>  | 0.9190 | unknown protein                                                              | 262696_at |
| <i>A4g49870</i>  | 0.9190 | TLD-domain containing nucleolar protein]                                     | 252867_at |
| <i>A13g62660</i> | 0.9190 | GATL7__galacturonosyltransferase-like 7]                                     | 251225_at |
| <i>A4g20160</i>  | 0.9180 | unknown protein                                                              | 254507_at |
| <i>A13g05140</i> | 0.9170 | RBK2__ROP binding protein kinases 2]                                         | 259350_at |
| <i>A15g21050</i> | 0.9170 | unknown protein                                                              | 246188_at |
| <i>A1g53320</i>  | 0.9160 | AtTLPT7_TLPT7__hubby like protein 7]                                         | 260588_at |
| <i>A1g07330</i>  | 0.9150 | unknown protein                                                              | 257489_at |
| <i>A4g21420</i>  | 0.9150 | unknown protein                                                              | 254411_at |
| <i>A4g20870</i>  | 0.9150 | ATFAH2_FAH2__fatty acid hydroxylase 2]                                       | 254448_at |
| <i>A13g04630</i> | 0.9140 | WDL1__WVD2-like 1]                                                           | 258796_at |
| <i>A13g11740</i> | 0.9140 | Protein of unknown function (DUF567)]                                        | 258781_at |
| <i>A1g79640</i>  | 0.9140 | Protein kinase superfamily protein]                                          | 261401_at |
| <i>A13g18810</i> | 0.9140 | AtPERK6_PERK6__Protein kinase superfamily protein]                           | 257804_at |
| <i>A1g14290</i>  | 0.9140 | SBH2__sphingoid base hydroxylase 2]                                          | 261492_at |
| <i>A13g11850</i> | 0.9140 | Protein of unknown function, DUF593]                                         | 258777_at |
| <i>255489_at</i> | 0.9140 | unknown protein                                                              | 255489_at |
| <i>A15g45810</i> | 0.9130 | CIPK19_SnRK3.5__CBL-interacting protein kinase 19]                           | 248909_at |
| <i>A15g45840</i> | 0.9130 | Leucine-rich repeat protein kinase family protein]                           | 248916_at |
| <i>A12g15880</i> | 0.9130 | Leucine-rich repeat (LRR) family protein]                                    | 265536_at |
| <i>A13g09760</i> | 0.9120 | RING/U-box superfamily protein]                                              | 258718_at |
| <i>A1g05960</i>  | 0.9120 | ARM repeat superfamily protein]                                              | 260961_at |
| <i>A13g01250</i> | 0.9120 | unknown protein                                                              | 259265_at |
| <i>A15g01960</i> | 0.9120 | AML1_ML1__MEI2-like protein 1]                                               | 247506_at |
| <i>A4g16745</i>  | 0.9110 | Exostosis family protein]                                                    | 245314_at |
| <i>A13g19360</i> | 0.9110 | CPK34__calcium-dependent protein kinase 34]                                  | 246065_at |
| <i>A12g34770</i> | 0.9100 | ATFAH1_FAH1__fatty acid hydroxylase 1]                                       | 267318_at |
| <i>A1g077730</i> | 0.9100 | Pleckstrin homology (PH) domain superfamily protein]                         | 259676_at |
| <i>A15g27000</i> | 0.9100 | ATK4_KATD__kinesin 4]                                                        | 246802_at |
| <i>A15g16480</i> | 0.9100 | PFA-DSP5__Phosphotyrosine protein phosphatases superfamily protein]          | 250124_at |
| <i>A13g24530</i> | 0.9100 | AAA-type ATPase family protein / ankyrin repeat family protein]              | 258134_at |
| <i>A1g74490</i>  | 0.9090 | Protein kinase superfamily protein]                                          | 260213_at |
| <i>A4g00350</i>  | 0.9090 | MATE efflux family protein]                                                  | 255717_at |
| <i>A15g02570</i> | 0.9090 | Histone superfamily protein]                                                 | 250997_at |
| <i>A1g79660</i>  | 0.9080 | unknown protein                                                              | 261356_at |
| <i>A4g39180</i>  | 0.9080 | ATSEC14_SEC14__Sec14p-like phosphatidylinositol transfer family protein]     | 252937_at |
| <i>A13g54690</i> | 0.9080 | SETH3__Sugar isomerase (SIS) family protein]                                 | 251855_at |
| <i>A13g05990</i> | 0.9070 | Leucine-rich repeat (LRR) family protein]                                    | 258557_at |
| <i>A12g38910</i> | 0.9070 | CPK20__calcium-dependent protein kinase 20]                                  | 266199_at |
| <i>A12g21480</i> | 0.9070 | Malectin/receptor-like protein kinase family protein]                        | 263748_at |
| <i>A15g32440</i> | 0.9070 | Ubiquitin system component Cue protein]                                      | 246171_at |
| <i>A15g17400</i> | 0.9070 | ER-ANT1__endoplasmic reticulum-adenine nucleotide transporter 1]             | 246427_at |
| <i>A15g04460</i> | 0.9060 | RING/U-box superfamily protein]                                              | 250888_at |

|                  |        |                                                                            |           |
|------------------|--------|----------------------------------------------------------------------------|-----------|
| <i>At2g40090</i> | 0.9060 | ATATH9_ATH9_ABC2 homolog 9]                                                | 265721_at |
| <i>At2g29050</i> | 0.9060 | ATRBL1_RBL1_RHOMBOD-like 1]                                                | 266774_at |
| <i>At5g51030</i> | 0.9050 | NAD(P)-binding Rossmann-fold superfamily protein]                          | 248484_at |
| <i>At5g57320</i> | 0.9050 | VLN5_villin, putative]                                                     | 247928_at |
| <i>At3g24620</i> | 0.9050 | ATROPGEF8_ROPGEF8_RHO guanyl-nucleotide exchange factor 8]                 | 258129_at |
| <i>At3g28490</i> | 0.9050 | Oxoglutarate/iron-dependent oxygenase]                                     | 257870_at |
| <i>At2g19880</i> | 0.9040 | Nucleotide-diphospho-sugar transferases superfamily protein]               | 266703_at |
| <i>At1g79400</i> | 0.9040 | ATCHX2_CHX2_cation/H+ exchanger 2]                                         | 262936_at |
| <i>At2g18280</i> | 0.9040 | AtILP2_TLP2_tubby like protein 2]                                          | 265321_at |
| <i>At4g40020</i> | 0.9040 | Myosin heavy chain-related protein]                                        | 252873_at |
| <i>At2g35210</i> | 0.9040 | AGD10_MEE28_RPA_root and pollen arfgap]                                    | 266548_at |
| <i>At3g08730</i> | 0.9040 | ATPK1_ATPK6_ATSGK1_PK1_PK6_S6K1__protein-serine kinase 1]                  | 258677_at |
| <i>At1g75160</i> | 0.9040 | Protein of unknown function (DUF620)]                                      | 256506_at |
| <i>At4g27880</i> | 0.9030 | Protein with RING/U-box and TRAF-like domains]                             | 253838_at |
| <i>At2g37670</i> | 0.9030 | Transducin/WD40 repeat-like superfamily protein]                           | 267160_at |
| <i>At1g74010</i> | 0.9030 | Calcium-dependent phosphotriesterase superfamily protein]                  | 260386_at |
| <i>At1g11990</i> | 0.9030 | O-fucosyltransferase family protein]                                       | 264387_at |
| <i>At2g33270</i> | 0.9030 | ACHT3_atypical CYS_HIS rich thioredoxin 3]                                 | 255847_at |
| <i>At1g08135</i> | 0.9030 | ATCHX6B_CHX6B_cation/H+ exchanger 6B]                                      | 261816_at |
| <i>At5g14870</i> | 0.9020 | ATCNGC18_CNGC18_cyclic nucleotide-gated channel 18]                        | 246590_at |
| <i>At5g54130</i> | 0.9020 | Calcium-binding endonuclease/exonuclease/phosphatase family]               | 248190_at |
| <i>At4g13560</i> | 0.9020 | UNE15_Late embryogenesis abundant protein (LEA) family protein]            | 254716_at |
| <i>At2g03060</i> | 0.9020 | AGL30_AGAMOUS-like 30]                                                     | 266793_at |
| <i>At3g55180</i> | 0.9020 | alpha/beta-Hydrolases superfamily protein]                                 | 251835_at |
| <i>At5g57830</i> | 0.9020 | Protein of unknown function, DUF593]                                       | 247885_at |
| <i>At4g25150</i> | 0.9000 | HAD superfamily, subfamily IIIB acid phosphatase ]                         | 254096_at |
| <i>At4g33230</i> | 0.9000 | Plant invertase/pectin methyltransferase inhibitor superfamily]            | 253370_at |
| <i>At1g12070</i> | 0.9000 | Immunoglobulin E-set superfamily protein]                                  | 264395_at |
| <i>At1g50810</i> | 0.9000 |                                                                            | 265491_s_ |
| <i>At4g13450</i> | 0.9000 | Adenine nucleotide alpha hydrolases-like superfamily protein]              | 254775_at |
| <i>At3g03430</i> | 0.8990 | Calcium-binding EF-hand family protein]                                    | 259044_at |
| <i>At3g04360</i> | 0.8980 | Calcium-dependent lipid-binding (CaLB domain) family protein]              | 258591_at |
| <i>At1g22110</i> | 0.8980 | structural constituent of ribosome]                                        | 255950_at |
| <i>At1g61770</i> | 0.8980 | Chaperone DnaJ-domain superfamily protein]                                 | 264427_at |
| <i>At3g60330</i> | 0.8970 | AHA7_HA7_H(+)-ATPase 7]                                                    | 251405_at |
| <i>At3g2460</i>  | 0.8970 | hydroxyproline-rich glycoprotein family protein]                           | 252046_at |
| <i>At3g10540</i> | 0.8970 | 3-phosphoinositide-dependent protein kinase]                               | 258064_at |
| <i>At3g38760</i> | 0.8970 | Late embryogenesis abundant protein (LEA) family protein]                  | 249536_at |
| <i>At4g34940</i> | 0.8970 | ARO1_armadillo repeat only 1]                                              | 253214_at |
| <i>At2g41210</i> | 0.8970 | PIPSK5_phosphatidylinositol-4-phosphate 5-kinase 5]                        | 267081_at |
| <i>At2g46300</i> | 0.8960 | Late embryogenesis abundant (LEA) hydroxyproline-rich glycoprotein family] | 266607_at |
| <i>At3g28630</i> | 0.8960 | Protein of unknown function (DUF569)]                                      | 256992_at |
| <i>At2g48150</i> | 0.8960 | ATGPX4_GPX4_glutathione peroxidase 4]                                      | 262350_at |
| <i>At4g20380</i> | 0.8950 | LSD1 zinc finger family protein]                                           | 254477_at |
| <i>At1g24110</i> | 0.8950 | Peroxidase superfamily protein]                                            | 264863_at |
| <i>At1g49290</i> | 0.8950 | unknown protein                                                            | 257469_at |
| <i>At4g18395</i> | 0.8950 | unknown protein                                                            | 254627_at |
| <i>At5g22000</i> | 0.8940 | RHF2A_RING-H2 group F2A]                                                   | 245684_at |
| <i>At1g18150</i> | 0.8940 | ATMPK8_MPK8_Protein kinase superfamily protein]                            | 256075_at |
| <i>At4g15200</i> | 0.8940 | AFH3_FH3_formin 3]                                                         | 245537_at |
| <i>At5g66740</i> | 0.8930 | Protein of unknown function (DUF620)]                                      | 247055_at |
| <i>At3g10470</i> | 0.8930 | C2H2-type zinc finger family protein]                                      | 258967_at |
| <i>At1g06890</i> | 0.8930 | nodulin MtN21/EamA-like transporter family protein]                        | 260818_at |
| <i>At2g38500</i> | 0.8930 | 2-oxoglutarate (2OG) and Fe(II)-dependent oxygenase superfamily protein]   | 267051_at |
| <i>At1g67810</i> | 0.8920 | SUFE2_sulfur E2]                                                           | 245193_at |
| <i>At2g29410</i> | 0.8920 | ATMTPB1_MTPB1_metal tolerance protein B1]                                  | 266273_at |
| <i>At4g27110</i> | 0.8920 | COBL11_COBRA-like protein 11 precursor]                                    | 253924_at |
| <i>At2g41970</i> | 0.8910 | Protein kinase superfamily protein]                                        | 267582_at |
| <i>At2g19050</i> | 0.8900 | GDSL-like Lipase/Acylhydrolase superfamily protein]                        | 267438_at |
| <i>At4g18700</i> | 0.8900 | ATWL4_C1PK12_SoRCK3_9_WL4_CBL-interacting protein kinase 12]               | 254636_at |
| <i>At5g57460</i> | 0.8890 | ATTPA_Haloacid dehalogenase-like hydrolase (HAD) superfamily protein]      | 248404_at |
| <i>At1g11040</i> | 0.8890 | HSP40[Dna] peptidyl-binding protein]                                       | 260478_at |
| <i>At1g68610</i> | 0.8890 | PCR11_PLANT CADMIUM RESISTANCE 11]                                         | 262282_at |
| <i>At4g33970</i> | 0.8890 | Leucine-rich repeat (LRR) family protein]                                  | 253318_at |
| <i>At3g22290</i> | 0.8880 | Endoplasmic reticulum vesicle transporter protein]                         | 258448_at |
| <i>At3g55190</i> | 0.8880 | alpha/beta-Hydrolases superfamily protein]                                 | 251836_at |
| <i>At4g15980</i> | 0.8880 | Plant invertase/pectin methyltransferase inhibitor superfamily]            | 245468_at |
| <i>At3g61580</i> | 0.8880 | AtSLD1_SLD1_Fatty acid/sphingolipid desaturase]                            | 251323_at |
| <i>At3g14595</i> | 0.8870 | Ribosomal protein L18ae family]                                            | 258092_at |
| <i>At4g32630</i> | 0.8870 | ArfGap/RecO-like zinc finger domain-containing protein]                    | 253447_at |
| <i>At2g30690</i> | 0.8870 | Protein of unknown function, DUF593]                                       | 267575_at |
| <i>At2g20430</i> | 0.8870 | RIC6_ROP-interactive CRIB motif-containing protein 6]                      | 257397_at |
| <i>At1g06970</i> | 0.8860 | ATCHX14_CHX14_cation/hydrogen exchanger 14]                                | 256051_at |
| <i>At4g28000</i> | 0.8860 | P-loop containing nucleoside triphosphate hydrolases superfamily protein]  | 253846_at |
| <i>At1g03457</i> | 0.8860 | RNA-binding (RRM/RBD/RNP motifs) family protein]                           | 264822_at |
| <i>At1g47270</i> | 0.8850 | AtILP6_TLP6_tubby like protein 6]                                          | 260502_at |
| <i>At1g04600</i> | 0.8840 | ATXIA_XIA_myosin XI A]                                                     | 264599_at |
| <i>At3g52620</i> | 0.8840 | unknown protein                                                            | 252061_at |
| <i>At2g37010</i> | 0.8840 | ATNAP12_NAP12_non-intrinsic ABC protein 12]                                | 263889_at |
| <i>At1g65240</i> | 0.8830 | Eukaryotic aspartyl protease family protein]                               | 263108_at |
| <i>At3g20300</i> | 0.8830 | Protein of unknown function (DUF3537)]                                     | 257672_at |
| <i>At5g20810</i> | 0.8830 | SAUR-like auxin-responsive protein family                                  | 245997_at |
| <i>At5g04390</i> | 0.8830 | C2H2-type zinc finger family protein]                                      | 245705_at |
| <i>At4g38190</i> | 0.8820 | ATCSLD4_CSLD4_cellulose synthase like D4]                                  | 253031_at |
| <i>At5g54310</i> | 0.8820 | AGD5_NEF_ARF-GAP domain 5]                                                 | 248180_at |
| <i>At2g55110</i> | 0.8820 | GAE4_UDP-D-glucuronate 4-epimerase 4]                                      | 245123_at |
| <i>At3g00010</i> | 0.8810 | farric reductase-like transmembrane component family protein]              | 247647_at |
| <i>At3g16380</i> | 0.8810 | PAB6_poly(A) binding protein 6]                                            | 259377_at |
| <i>At3g08990</i> | 0.8800 | Yippee family putative zinc-binding protein]                               | 257522_at |
| <i>At2g25600</i> | 0.8800 | AKT6_SPIK_Shaker pollen inward K+ channel]                                 | 265903_at |
| <i>At3g56800</i> | 0.8800 | ACAM-3_CAM3_calmodulin 3]                                                  | 246290_at |
| <i>At3g60570</i> | 0.8790 | ATEXPB5_ATHXP BETA 1.3_EXPB5_expansin B5]                                  | 251397_at |
| <i>At5g47470</i> | 0.8780 | Nodulin MtN21/EamA-like transporter family protein]                        | 248804_at |
| <i>At4g26650</i> | 0.8770 | RNA-binding (RRM/RBD/RNP motifs) family protein]                           | 253926_at |
| <i>At1g22200</i> | 0.8770 | Endoplasmic reticulum vesicle transporter protein]                         | 255925_at |
| <i>At2g46490</i> | 0.8770 | unknown protein                                                            | 265451_at |
| <i>At2g25880</i> | 0.8770 | AtAUR2_AUR2_ataurora2]                                                     | 266655_at |
| <i>At3g52080</i> | 0.8760 | chx28_cation/hydrogen exchanger 28]                                        | 252087_at |
| <i>At2g13620</i> | 0.8760 | ATCHX15_CHX15_CHX15_cation/hydrogen exchanger 15]                          | 263720_at |
| <i>At2g03840</i> | 0.8760 | TET13_tetraspanin13]                                                       | 263361_at |
| <i>At1g05020</i> | 0.8750 | ENTH/ANTH/VHS superfamily protein]                                         | 265213_at |
| <i>At5g15470</i> | 0.8750 | GAUT14_galacturonosyltransferase 14]                                       | 246555_at |
| <i>At4g30770</i> | 0.8740 | Putative membrane lipoprotein]                                             | 253587_at |
| <i>260342_at</i> | 0.8740 |                                                                            | 260342_at |
| <i>At3g01630</i> | 0.8740 | Major facilitator superfamily protein]                                     | 259177_at |
| <i>At5g24940</i> | 0.8740 | Protein phosphatase 2C family protein]                                     | 246971_at |
| <i>At1g06750</i> | 0.8730 | P-loop containing nucleoside triphosphate hydrolases superfamily protein]  | 260828_at |
| <i>At4g34750</i> | 0.8730 | SAUR-like auxin-responsive protein family                                  | 253253_at |
| <i>At2g68660</i> | 0.8730 | APP3_PP3_pyrophosphorylase 3]                                              | 266765_at |
| <i>At2g03980</i> | 0.8730 | GDSL-like Lipase/Acylhydrolase superfamily protein]                        | 263482_at |
| <i>At5g02180</i> | 0.8730 | Transmembrane amino acid transporter family protein]                       | 251024_at |
| <i>At3g51150</i> | 0.8720 | ATP binding microtubule motor family protein]                              | 252143_at |
| <i>At2g19000</i> | 0.8720 | unknown protein                                                            | 267443_at |
| <i>At2g39700</i> | 0.8720 | ATEXP4_ATEXP4_ATHXP ALPHA 1.6_EXPA4_expansin A4]                           | 267590_at |
| <i>At1g11250</i> | 0.8720 | ATSYPI25_SYP125_syntaxin of plants 125]                                    | 262511_at |
| <i>At4g00110</i> | 0.8710 | GAE3_UDP-D-glucuronate 4-epimerase 3]                                      | 255696_at |
| <i>At3g57480</i> | 0.8700 | zinc finger (C2H2 type, AN1-like) family protein]                          | 251634_at |
| <i>At1g26840</i> | 0.8690 | ATORC6_ORC6_origin recognition complex protein 6]                          | 263681_at |
| <i>At1g15920</i> | 0.8690 | Polynucleotidyl transferase, ribonuclease H-like superfamily protein]      | 261841_at |
| <i>At3g48450</i> | 0.8690 | RP1-interacting protein 4 (RIN4) family protein]                           | 252364_at |
| <i>At5g64690</i> | 0.8690 | neurofilament triplet H protein-related]                                   | 247242_at |
| <i>At1g01500</i> | 0.8680 | Erythronate-4-phosphate dehydrogenase family protein]                      | 259436_at |
| <i>At5g40155</i> | 0.8680 | Defensin-like (DEFL) family protein]                                       | 249402_at |
| <i>At5g59030</i> | 0.8680 | COPT1_copper transporter 1]                                                | 247745_at |
| <i>At1g51260</i> | 0.8680 | LPAT3_lyso-phosphatidyl acyltransferase 3]                                 | 265134_at |
| <i>At4g15200</i> | 0.8680 |                                                                            |           |
| <i>At3g12600</i> | 0.8680 | atnud16_NUDT16_nudix hydrolase homolog 16]                                 | 256240_at |

|                  |        |                                                                                               |           |
|------------------|--------|-----------------------------------------------------------------------------------------------|-----------|
| <i>At4g15530</i> | 0.8670 | PPDK_pyruvate orthophosphate dikinase]                                                        | 245528_at |
| <i>At5g39650</i> | 0.8670 | DAU2_Protein of unknown function (DUF679)]                                                    | 249468_at |
| <i>At5g25430</i> | 0.8660 | HCO3- transporter family]                                                                     | 246942_at |
| <i>At5g58950</i> | 0.8660 | Protein kinase superfamily protein]                                                           | 247750_at |
| <i>At2g38400</i> | 0.8650 | AGT3_alanine:glyoxylate aminotransferase 3]                                                   | 267035_at |
| <i>At2g31800</i> | 0.8650 | Integrin-linked protein kinase family]                                                        | 263461_at |
| <i>At5g37060</i> | 0.8650 | ATCHX24_CHX24_cation/H+ exchanger 24]                                                         | 249649_at |
| <i>At1g29750</i> | 0.8650 | RKF1_receptor-like kinase in flowers 1]                                                       | 255995_at |
| <i>At3g03090</i> | 0.8640 | AtVGT1_VGT1_vacuolar glucose transporter 1]                                                   | 258869_at |
| <i>At3g56960</i> | 0.8640 | PIP5K4_phosphatidylinositol monophosphate 5 kinase 4]                                         | 251711_at |
| <i>265829_at</i> | 0.8640 |                                                                                               | 265829_at |
| <i>At3g44070</i> | 0.8640 | Glycosyl hydrolase family 35 protein]                                                         | 252663_at |
| <i>At1g17483</i> | 0.8640 | alpha/beta-Hydrolases superfamily protein]                                                    | 245423_at |
| <i>At4g27840</i> | 0.8640 | SNARE-like superfamily protein]                                                               | 253836_at |
| <i>At3g10090</i> | 0.8630 | TPR13_Tetratricopeptide repeat (TPR)-like superfamily protein]                                | 250466_at |
| <i>At1g74780</i> | 0.8630 | Nodulin-like / Major Facilitator Superfamily protein]                                         | 262216_at |
| <i>At3g61710</i> | 0.8620 | unknown protein                                                                               | 247539_at |
| <i>At5g54130</i> | 0.8620 |                                                                                               |           |
| <i>At3g12160</i> | 0.8610 | ATRABA4D_RABA4D_RAB GTPase homolog A4D]                                                       | 256261_at |
| <i>At5g40730</i> | 0.8600 | AGP24_ATAGP24_arabinogalactan protein 24]                                                     | 249375_at |
| <i>At1g20630</i> | 0.8600 | CAT1_catalase 1]                                                                              | 259517_at |
| <i>At1g63220</i> | 0.8590 | Calcium-dependent lipid-binding (CaLB domain) family protein]                                 | 260083_at |
| <i>At5g57200</i> | 0.8590 | ENTH/ANTH/VHS superfamily protein]                                                            | 247941_at |
| <i>At3g24760</i> | 0.8580 | Galactose oxidase/kelch repeat superfamily protein]                                           | 257596_at |
| <i>At1g33770</i> | 0.8580 | Protein kinase superfamily protein]                                                           | 261983_at |
| <i>At4g39670</i> | 0.8570 | Glycolipid transfer protein (GLTP) family protein]                                            | 252908_at |
| <i>At1g15470</i> | 0.8560 | Transducin/WD40 repeat-like superfamily protein]                                              | 262597_at |
| <i>At1g64610</i> | 0.8560 | Transducin/WD40 repeat-like superfamily protein]                                              | 261973_at |
| <i>At2g37620</i> | 0.8550 | AAc1_ACT1_actin 1]                                                                            | 267175_s_ |
| <i>At1g28960</i> | 0.8550 | ATNUDT15_ATNUDX15_NUDX15_nudix hydrolase homolog 15]                                          | 262746_at |
| <i>At5g41730</i> | 0.8550 | Protein kinase family protein]                                                                | 249263_at |
| <i>At4g31230</i> | 0.8550 | Protein kinase protein with adenine nucleotide alpha hydrolases-like domain]                  | 253567_at |
| <i>At1g79450</i> | 0.8550 | ALIS5_ALA-interacting subunit 5]                                                              | 262942_at |
| <i>At1g10620</i> | 0.8550 | AtPERK11_PERK11_Protein kinase superfamily protein]                                           | 261830_at |
| <i>At5g33360</i> | 0.8540 | TRAF-like superfamily protein]                                                                | 248256_at |
| <i>At5g35980</i> | 0.8530 | serine-rich protein-related]                                                                  | 248038_at |
| <i>At1g07623</i> | 0.8530 | F-box family protein]                                                                         | 260197_at |
| <i>At5g41310</i> | 0.8510 | P-loop nucleoside triphosphate hydrolases superfamily protein                                 | 249296_at |
| <i>At1g17290</i> | 0.8510 | AlaAT1_alanine aminotransferase]                                                              | 260847_s_ |
| <i>At5g03760</i> | 0.8500 | CSLA9_RAT4_Nucleotide-diphospho-sugar transferases superfamily protein]                       | 250892_at |
| <i>At1g79250</i> | 0.8490 | AGC17_AGC kinase 1.7]                                                                         | 264127_at |
| <i>At5g23670</i> | 0.8490 | LCB2_long chain base2]                                                                        | 249799_at |
| <i>At4g02380</i> | 0.8480 | AtLEA5_SAG21_senescence-associated gene 21]                                                   | 255479_at |
| <i>At3g50310</i> | 0.8480 | MAPKKK20_MKKK20_mitogen-activated protein kinase kinase kinase 20]                            | 252212_at |
| <i>252225_at</i> | 0.8480 |                                                                                               | 252225_at |
| <i>At5g10500</i> | 0.8480 | Kinase interacting (KIP1-like) family protein]                                                | 250427_at |
| <i>At5g20460</i> | 0.8470 | unknown protein                                                                               | 246080_at |
| <i>At2g19400</i> | 0.8470 | AGC (cAMP-dependent, cGMP-dependent and protein kinase C) kinase family protein]              | 267281_at |
| <i>At1g14560</i> | 0.8470 | Mitochondrial substrate carrier family protein]                                               | 260777_at |
| <i>At3g04690</i> | 0.8460 | ANX1_Maleicn/receptor-like protein kinase family protein]                                     | 258843_at |
| <i>At5g24880</i> | 0.8460 | BEST Arabidopsis thaliana protein match is: calmodulin-binding protein-related                | 246969_at |
| <i>At2g43790</i> | 0.8460 | ATMAPK6_ATMPK6_MAPK6_MPK6_MAP kinase 6]                                                       | 260571_at |
| <i>At1g04985</i> | 0.8450 | unknown protein; Has 37 Blast hits to 37 proteins in 11 species: Archae - 0; Bacteria - 0; Mi | 261179_at |
| <i>At1g15880</i> | 0.8450 | atgosl1_GOS11_golgi snare 11]                                                                 | 259498_at |
| <i>At4g33850</i> | 0.8440 |                                                                                               | 253312_s_ |
| <i>At4g14810</i> | 0.8440 | unknown protein                                                                               | 245579_at |
| <i>At2g28440</i> | 0.8440 | proline-rich family protein]                                                                  | 265275_at |
| <i>At1g19780</i> | 0.8430 | ATCNGC8_CNGC8_CNGC8_cyclic nucleotide gated channel 8]                                        | 261142_at |
| <i>At3g06150</i> | 0.8420 | unknown protein                                                                               | 256396_at |
| <i>At4g20880</i> | 0.8410 | ethylene-responsive nuclear protein / ethylene-regulated nuclear protein (ERT2)]              | 254434_at |
| <i>At1g18410</i> | 0.8410 | P-loop containing nucleoside triphosphate hydrolases superfamily protein]                     | 261716_at |
| <i>At1g02400</i> | 0.8410 | NAC (No Apical Meristem) domain transcriptional regulator superfamily protein]                | 264269_at |
| <i>At5g65160</i> | 0.8410 | TPR14_tetratricopeptide repeat (TPR)-containing protein]                                      | 247229_at |
| <i>At2g03720</i> | 0.8400 | CAT4_cationic amino acid transporter 4]                                                       | 259337_at |
| <i>At1g26480</i> | 0.8390 | GF14_IOTA_GRF12_general regulatory factor 12]                                                 | 261015_at |
| <i>At1g19110</i> | 0.8390 | inter-alpha-trypsin inhibitor heavy chain-related]                                            | 259470_at |
| <i>At2g37070</i> | 0.8380 | unknown protein                                                                               | 265465_at |
| <i>At1g49270</i> | 0.8380 | AtPERK7_PERK7_Protein kinase superfamily protein]                                             | 262389_at |
| <i>At5g02390</i> | 0.8380 | DAU1_Protein of unknown function (DUF3741)]                                                   | 251047_at |
| <i>At5g03690</i> | 0.8380 | Aldolase superfamily protein]                                                                 | 250917_at |
| <i>At2g04410</i> | 0.8370 | RPM1-interacting protein 4 (RIN4) family protein]                                             | 263856_at |
| <i>At2g29040</i> | 0.8370 | Exostosin family protein]                                                                     | 266773_at |
| <i>At1g47380</i> | 0.8370 | Protein phosphatase 2C family protein]                                                        | 261688_at |
| <i>At4g00720</i> | 0.8360 | ASKTHETA_ATSK32_SK32_shaggy-like protein kinase 32]                                           | 255635_at |
| <i>At3g44920</i> | 0.8360 | ATCHX11_CHX11_cation/H+ exchanger 11]                                                         | 246338_s_ |
| <i>At4g31020</i> | 0.8360 | alpha/beta-Hydrolases superfamily protein]                                                    | 253573_at |
| <i>At4g35790</i> | 0.8350 | ATPLDDELTA_PLDDELTA_phospholipase D delta]                                                    | 253120_at |
| <i>At3g47080</i> | 0.8350 | Tetratricopeptide repeat (TPR)-like superfamily protein]                                      | 252467_at |
| <i>At5g48270</i> | 0.8350 | Plant protein of unknown function (DUF868)]                                                   | 248711_at |
| <i>At2g13570</i> | 0.8340 | NF-YB7_nuclear factor Y, subunit B7]                                                          | 263718_at |
| <i>At4g17790</i> | 0.8340 | SNARE associated Golgi protein family]                                                        | 245361_at |
| <i>At4g19120</i> | 0.8340 | S-adenosyl-L-methionine-dependent methyltransferases superfamily protein]                     | 254563_at |
| <i>At2g18080</i> | 0.8340 | EDA2_Serine carboxypeptidase S28 family protein]                                              | 265811_at |
| <i>At1g03620</i> | 0.8330 | ELMO/CED-12 family protein]                                                                   | 264815_at |
| <i>At3g16350</i> | 0.8330 | Homeodomain-like superfamily protein]                                                         | 259379_at |
| <i>At2g47490</i> | 0.8320 | ATNDT1_NDT1_NAD+ transporter 1]                                                               | 245152_at |
| <i>At2g02960</i> | 0.8310 | RING/FYVE/PHD zinc finger superfamily protein]                                                | 266791_at |
| <i>At5g01690</i> | 0.8300 | ATCHX27_CHX27_cation/H+ exchanger 27]                                                         | 251102_at |
| <i>At1g27700</i> | 0.8300 | Syntaxin/t-SNARE family protein]                                                              | 261649_at |
| <i>At3g06560</i> | 0.8300 | PAPS3_poly(A) polymerase 3]                                                                   | 258564_at |
| <i>At3g51030</i> | 0.8300 | ATTRX_H1_ATTRX1_TRX1_thioredoxin H-type 1]                                                    | 252119_at |
| <i>At1g51410</i> | 0.8300 | NAD(P)-binding Rossmann-fold superfamily protein]                                             | 260518_at |
| <i>At1g18750</i> | 0.8290 | AGL65_AGAMOUS-like 65]                                                                        | 261423_at |
| <i>At4g37280</i> | 0.8290 | MRG family protein]                                                                           | 246234_at |
| <i>At5g53520</i> | 0.8290 | ATOPT8_OPT8_oligopeptide transporter 8]                                                       | 248275_at |
| <i>At5g45820</i> | 0.8280 | CIPK20_PKS18_SnRK3.6_CBL-interacting protein kinase 20]                                       | 248910_at |
| <i>At1g22460</i> | 0.8280 | O-fucosyltransferase family protein]                                                          | 261929_at |
| <i>At2g01450</i> | 0.8270 | ATMPK17_MPK17_MAP kinase 17]                                                                  | 266348_at |
| <i>At3g02440</i> | 0.8270 | TBL20_TRICHOME BIREFRINGENCE-LIKE 20]                                                         | 258479_at |
| <i>At4g03110</i> | 0.8270 | AtRBP-DR1_RBP-DR1_RNA-binding protein-defense related 1]                                      | 255411_at |
| <i>At5g09550</i> | 0.8270 | GDP dissociation inhibitor family protein / Rab GTPase activator family protein]              | 250514_at |
| <i>At2g24320</i> | 0.8270 | alpha/beta-Hydrolases superfamily protein]                                                    | 265690_at |
| <i>At1g22130</i> | 0.8270 | AGL104_AGAMOUS-like 104]                                                                      | 255952_at |
| <i>At5g25530</i> | 0.8270 | DNAJ heat shock family protein]                                                               | 246894_at |
| <i>At3g23900</i> | 0.8260 | ATHMT-1_HMT-1_Homocysteine S-methyltransferase family protein]                                | 258075_at |
| <i>At5g10740</i> | 0.8250 | Protein phosphatase 2C family protein]                                                        | 250400_at |
| <i>At5g01800</i> | 0.8250 | saposin B domain-containing protein]                                                          | 251074_at |
| <i>At3g36660</i> | 0.8250 | PABY_poy(A) binding protein 7]                                                                | 265205_at |
| <i>At3g01260</i> | 0.8240 | Remorin family protein]                                                                       | 251306_at |
| <i>At1g77980</i> | 0.8240 | AGL66_AGAMOUS-like 66]                                                                        | 262179_at |
| <i>At5g16100</i> | 0.8240 | unknown protein                                                                               | 246491_at |
| <i>At3g35410</i> | 0.8230 | ATSOS2_CIPK24_SNRK3.11_SOS2_Protein kinase superfamily protein]                               | 246614_at |
| <i>At2g45610</i> | 0.8230 | alpha/beta-Hydrolases superfamily protein]                                                    | 267527_at |
| <i>At1g09600</i> | 0.8230 | Protein kinase superfamily protein]                                                           | 264558_at |
| <i>At5g18150</i> | 0.8230 | Methyltransferase-related protein]                                                            | 250018_at |
| <i>At5g47180</i> | 0.8230 | Plant VAMP (vesicle-associated membrane protein) family protein]                              | 248796_at |
| <i>At3g48010</i> | 0.8220 | ATCNGC16_CNGC16_cyclic nucleotide-gated channel 16]                                           | 252399_at |
| <i>At2g19330</i> | 0.8220 | PIRL6_plant intracellular ras group-related LRR 6]                                            | 267322_at |
| <i>At3g59350</i> | 0.8220 | Protein kinase superfamily protein]                                                           | 251494_at |
| <i>At5g57740</i> | 0.8210 | XBAT32_XB3 ortholog 2 in Arabidopsis thaliana]                                                | 247877_at |
| <i>At1g03610</i> | 0.8190 | Protein of unknown function (DUF789)]                                                         | 264836_at |
| <i>At5g64920</i> | 0.8180 | CIP8_COP1-interacting protein 8]                                                              | 247219_at |
| <i>At4g09950</i> | 0.8180 | P-loop containing nucleoside triphosphate hydrolases superfamily protein]                     | 255003_at |
| <i>At5g10950</i> | 0.8180 | Tudor/PWWP/MBT superfamily protein]                                                           | 250395_at |
| <i>At2g42380</i> | 0.8180 | BZIP34_Basic-leucine zipper (bZIP) transcription factor family protein]                       | 265877_at |
| <i>At1g74220</i> | 0.8180 | unknown protein                                                                               | 260246_at |
| <i>At1g74320</i> | 0.8170 | Protein kinase superfamily protein]                                                           | 260244_at |



|                  |        |                                                                            |           |
|------------------|--------|----------------------------------------------------------------------------|-----------|
| <i>At3g06483</i> | 0.8160 | ATPDHK_PDK_pyruvate dehydrogenase kinase]                                  | 258902_at |
| <i>At5g16110</i> | 0.8150 | unknown protein                                                            | 246506_at |
| <i>At1g73480</i> | 0.8140 | alpha/beta-Hydrolases superfamily protein]                                 | 245734_at |
| <i>At1g19890</i> | 0.8140 | ATMGH3_MGH3_male-gamete-specific histone H3]                               | 255815_at |
| <i>At1g72460</i> | 0.8130 | Leucine-rich repeat protein kinase family protein]                         | 260424_at |
| <i>At2g22340</i> | 0.8130 | unknown protein                                                            | 264051_at |
| <i>At5g06560</i> | 0.8120 | Protein of unknown function, DUF593]                                       | 250692_at |
| <i>At3g54930</i> | 0.8120 | Protein phosphatase 2A regulatory B subunit family protein]                | 251865_at |
| <i>At2g29620</i> | 0.8110 | unknown protein                                                            | 266674_at |
| <i>At5g61350</i> | 0.8100 | Protein kinase superfamily protein]                                        | 247581_at |
| <i>At3g39680</i> | 0.8100 | unknown protein                                                            | 251477_at |
| <i>At3g12690</i> | 0.8100 | AGC1.5_AGC kinase 1.5]                                                     | 257696_at |
| <i>At1g70170</i> | 0.8070 | MMP_matrix metalloproteinase]                                              | 264716_at |
| <i>At2g39420</i> | 0.8070 | alpha/beta-Hydrolases superfamily protein]                                 | 266977_at |
| <i>At2g19010</i> | 0.8060 | GDSL-like Lipase/Acylhydrolase superfamily protein]                        | 267466_at |
| <i>At1g73630</i> | 0.8050 | EF hand calcium-binding protein family]                                    | 260076_at |
| <i>At1g18530</i> | 0.8040 | EF hand calcium-binding protein family]                                    | 255772_at |
| <i>At3g60780</i> | 0.8040 | Protein of unknown function (DUF1442)]                                     | 251339_at |
| <i>At5g56160</i> | 0.8030 | Sec14p-like phosphatidylinositol transfer family protein]                  | 247995_at |
| <i>At1g62450</i> | 0.8030 | Immunoglobulin E-set superfamily protein]                                  | 265115_at |
| <i>At3g35390</i> | 0.8020 | Leucine-rich repeat protein kinase family protein]                         | 246609_at |
| <i>At5g20690</i> | 0.8020 | Leucine-rich repeat protein kinase family protein]                         | 245992_at |
| <i>At2g16030</i> | 0.8010 | [S-adenosyl-L-methionine-dependent methyltransferases superfamily protein] | 253929_s_ |
| <i>At3g12110</i> | 0.8010 | ACT11_actin-11]                                                            | 256275_at |
| <i>At1g16360</i> | 0.8010 | LEM3 (ligand-effect modulator 3) family protein / CDC50 family protein]    | 262755_at |
| <i>At1g13900</i> | 0.8010 | Purple acid phosphatases superfamily protein]                              | 259420_at |
| <i>At5g46840</i> | 0.8010 | RNA-binding (RRM/RBD/RNP motifs) family protein]                           | 248869_at |
| <i>At5g18650</i> | 0.8010 | CHY-type/CTCHY-type/RING-type Zinc finger protein]                         | 250000_at |

**Supplementary Table S4.** Detailed information about pollen development-related genes that are co-expressed with ASK $\beta$ .

| At_Locus         | R-value to Bait | Gene Name       | Gene description                                                                                                                                                                                                                                                                                                                                                                                                                                             | Conserved Motifs    |
|------------------|-----------------|-----------------|--------------------------------------------------------------------------------------------------------------------------------------------------------------------------------------------------------------------------------------------------------------------------------------------------------------------------------------------------------------------------------------------------------------------------------------------------------------|---------------------|
| <i>At3g21180</i> | 0.9830          | <i>ACA9</i>     | One of the type IIB calcium pump isoforms. encodes an autoinhibited Ca(2+)-ATPase that contains an N-terminal calmodulin binding autoinhibitory domain.                                                                                                                                                                                                                                                                                                      | Motif 1, 2, 3, 6    |
| <i>At1g24520</i> | 0.9770          | <i>BCP1</i>     | HOMOLOG OF BRASSICA CAMPESTRIS POLLEN PROTEIN 1. Male fertility gene acting on tapetum and microspore                                                                                                                                                                                                                                                                                                                                                        | Motif 1, 2, 3, 6    |
| <i>At4g05330</i> | 0.9670          | <i>AGD13</i>    | A member of ARF GAP domain (AGD). A thaliana has 15 members, grouped into four classes.                                                                                                                                                                                                                                                                                                                                                                      | Motif 1, 2, 3       |
| <i>At3g57390</i> | 0.9650          | <i>AGL18</i>    | Encodes a MADS-box containing protein likely to be a transcription factor that is expressed in endosperm and developing gametophytes. The protein sequence is most similar to that of AGL15.                                                                                                                                                                                                                                                                 | Motif 1, 2, 3, 6    |
| <i>At3g62230</i> | 0.9640          | <i>DAF1</i>     | DUO1-ACTIVATED F-BOX 1. Target promoter of the male germline-specific transcription factor DUO1.                                                                                                                                                                                                                                                                                                                                                             | Motif 1, 2, 3, 5, 6 |
| <i>At5g64510</i> | 0.9580          | <i>TIN1</i>     | Encodes Tunicamycin Induced 1(TIN1), a plant-specific ER stress-inducible protein. TIN1 mutation affects pollen surface morphology. Transcriptionally induced by treatment with the N-linked glycosylation inhibitor tunicamycin.                                                                                                                                                                                                                            | Motif 1, 2, 3       |
| <i>At2g32460</i> | 0.9530          | <i>MYB101</i>   | Member of the R2R3 factor gene family.                                                                                                                                                                                                                                                                                                                                                                                                                       | Motif 1, 2, 3, 4, 6 |
| <i>At3g01040</i> | 0.9470          | <i>GAUT13</i>   | GALACTURONOSYLTRANSFERASE 13, Encodes a protein with putative galacturonosyltransferase activity.                                                                                                                                                                                                                                                                                                                                                            | Motif 1, 2, 3, 4, 6 |
| <i>At2g02970</i> | 0.9450          | <i>APY6</i>     | Encodes a putative apyrase involved in pollen exine pattern formation and anther dehiscence.                                                                                                                                                                                                                                                                                                                                                                 | Motif 1, 3, 6       |
| <i>At5g39400</i> | 0.9350          | <i>ATPTEN1</i>  | PHOSPHATASE AND TENSIN HOMOLOG DELETED ON CHROMOSOME TEN 1                                                                                                                                                                                                                                                                                                                                                                                                   | Motif 1, 2, 3, 6    |
| <i>At3g47440</i> | 0.9340          | <i>TIP5;1</i>   | Encodes ATIP5;1, functions as water and urea channels in pollen. Target promoter of the male germline-specific transcription factor DUO1.                                                                                                                                                                                                                                                                                                                    | Motif 1, 2, 3, 5    |
| <i>At4g35700</i> | 0.9340          | <i>DAZ3</i>     | DUO1-ACTIVATED ZINC FINGER 3. Target promoter of the male germline-specific transcription factor DUO1.                                                                                                                                                                                                                                                                                                                                                       | Motif 1, 2, 3, 5    |
| <i>At1g53320</i> | 0.9160          | <i>ATTLP7</i>   | TUBBY LIKE PROTEIN 7, Member of TLP family                                                                                                                                                                                                                                                                                                                                                                                                                   | Motif 1, 3, 4, 6    |
| <i>At2g35210</i> | 0.9040          | <i>RPA</i>      | ROOT AND POLLEN ARFGAP, A member of ARF GAP domain (AGD), A thaliana has 15 members, grouped into four classes.                                                                                                                                                                                                                                                                                                                                              | Motif 1, 2, 3, 6    |
| <i>At2g03060</i> | 0.9020          | <i>AGL30</i>    | Encodes a member of the MIKC (MADS box, Keratin binding domain, and C terminal domain containing) family of transcriptional regulators. AGL30 is expressed in pollen. It forms heterodimers with other MICK family members.                                                                                                                                                                                                                                  | Motif 1, 2, 3, 4, 6 |
| <i>At5g22000</i> | 0.8940          | <i>RHF2A</i>    | RING-H2 GROUP F2A, encodes a RING-type E3 ubiquitin ligase implicated in gametogenesis. Double mutant analyses with RHF1a suggests that RHF2a may be involved in targeting ICK4KRP6 for degradation following meiosis in order to allow the mitoses associated with megagametogenesis and microgametogenesis to occur. RHF2a is expressed in all four floral whorls and is present at ~8-fold higher levels than RHF1a in inflorescences by RT-PCR analyses. | Motif 1, 2, 3, 6    |
| <i>At3g10470</i> | 0.8930          | —               | C2H2-type zinc finger family protein                                                                                                                                                                                                                                                                                                                                                                                                                         | Motif 1, 2, 3, 4    |
| <i>At1g68610</i> | 0.8890          | <i>PCR11</i>    | PLANT CADMIUM RESISTANCE 11, Target promoter of the male germline-specific transcription factor DUO1.                                                                                                                                                                                                                                                                                                                                                        | Motif 1, 2, 3, 5, 6 |
| <i>At1g47270</i> | 0.8850          | <i>ATTLP6</i>   | TUBBY LIKE PROTEIN 6, Member of TLP family                                                                                                                                                                                                                                                                                                                                                                                                                   | Motif 1, 2, 3, 6    |
| <i>At5g15470</i> | 0.8750          | <i>GAUT14</i>   | Encodes a protein with putative galacturonosyltransferase activity.                                                                                                                                                                                                                                                                                                                                                                                          | Motif 1, 2, 3, 6    |
| <i>At5g59030</i> | 0.8680          | <i>COPT1</i>    | Encodes a putative copper transport protein that contains copper-binding motif and functionally complements in copper-transport defective yeast strains                                                                                                                                                                                                                                                                                                      | Motif 1, 2, 3       |
| <i>At5g39650</i> | 0.8670          | <i>DAU2</i>     | DUO1-ACTIVATED UNKNOWN 2. Target promoter of the male germline-specific transcription factor DUO1.                                                                                                                                                                                                                                                                                                                                                           | Motif 1, 2, 3, 5    |
| <i>At5g23670</i> | 0.8490          | <i>LCB2</i>     | LONG CHAIN BASE2, Encodes the LCB2 subunit of serine palmitoyltransferase, an enzyme involved in sphingosine biosynthesis. The protein is localized to the endoplasmic reticulum.                                                                                                                                                                                                                                                                            | Motif 1, 2, 3, 6    |
| <i>At3g50310</i> | 0.8480          | <i>MKKK20</i>   | MAPKKK20, MITOGEN-ACTIVATED PROTEIN KINASE KINASE KINASE 20. Encodes a member of MEKK subfamily. Target promoter of the male germline-specific transcription factor DUO1. Involved in osmotic stress response via regulation of MPK6 activity.                                                                                                                                                                                                               | Motif 1, 2, 3       |
| <i>At5g02390</i> | 0.8380          | <i>DAU1</i>     | DUO1-ACTIVATED UNKNOWN 1. Target promoter of the male germline-specific transcription factor DUO1.                                                                                                                                                                                                                                                                                                                                                           | Motif 1, 2, 3, 6    |
| <i>At2g18080</i> | 0.8340          | <i>EDA2</i>     | EMBRYO SAC DEVELOPMENT ARREST 2                                                                                                                                                                                                                                                                                                                                                                                                                              | Motif 1, 2, 3, 6    |
| <i>At5g53520</i> | 0.8290          | <i>ATOPT8</i>   | Encodes an oligopeptide transporter. Target promoter of the male germline-specific transcription factor DUO1.                                                                                                                                                                                                                                                                                                                                                | Motif 1, 2, 3, 6    |
| <i>At1g18750</i> | 0.8290          | <i>AGL65</i>    | Encodes a member of the MIKC (MADS box, Keratin binding domain, and C terminal domain containing) family of transcriptional regulators. AGL65 is expressed in pollen. It forms heterodimers with other MICK family members (AGL104). Involved in late stages of pollen development and pollen                                                                                                                                                                | Motif 1, 2, 3, 4, 6 |
| <i>At1g22130</i> | 0.8270          | <i>AGL104</i>   | Encodes a member of the MIKC (MADS box, Keratin binding domain, and C terminal domain containing) family of transcriptional regulators. AGL104 is expressed in pollen. It forms heterodimers with other MICK family members (AGL65 and AGL30). Involved in late stages of pollen development                                                                                                                                                                 | Motif 1, 2, 3, 6    |
| <i>At1g77980</i> | 0.8240          | <i>AGL66</i>    | Encodes a member of the MIKC (MADS box, Keratin binding domain, and C terminal domain containing) family of transcriptional regulators. AGL66 is expressed in pollen. It forms heterodimers with other MICK family members (AGL104). Involved in late stages of pollen development and pollen                                                                                                                                                                | Motif 1, 2, 3, 4, 6 |
| <i>At2g42380</i> | 0.8180          | <i>ATBZIP34</i> | Encodes a member of the BZIP family of transcription factors. Forms heterodimers with the related protein AtbZIP61. Binds to G-boxes in vitro and is localized to the nucleus in onion epidermal cells.                                                                                                                                                                                                                                                      | Motif 1, 2, 3, 6    |
| <i>At1g19890</i> | 0.8140          | <i>ATMGH3</i>   | Histone 3.3, male-gamete-specific expression. Direct target promoter of the male germline-specific transcription factor DUO1.                                                                                                                                                                                                                                                                                                                                | Motif 1, 2, 3, 5, 6 |



**Supplementary Table S6.** Putative phosphorylation sites on ASK $\beta$  co-expressed proteins predicted by Musite. Putative ASK phosphorylation sites and the regions carrying putative priming phosphorylation sites are indicated in red and bold, respectively.

| At Locus  | Gene Name | R-value to Bait                             | Position | Amino acid | Surround sequence                                             | Specificity |
|-----------|-----------|---------------------------------------------|----------|------------|---------------------------------------------------------------|-------------|
| AT3G21180 | ACA9      | 0.983                                       | 32       | S          | DMEAGSAKTEEH <b>SD</b> HEELQHDPDDP                            | 97.85%      |
|           |           |                                             | 28       | T          | GRHDDMEAGSAK <b>TE</b> EHSDHEELQHD                            | 94.73%      |
|           |           |                                             | 920      | T          | ATEPPTDHLMHRT <b>TP</b> VGRREPLITNI                           | 94.59%      |
|           |           |                                             | 120      | T          | LAGEQQIAFGSS <b>TP</b> AASTGNFDIDL                            | 94.15%      |
|           |           |                                             | 376      | T          | LMASISED <b>TG</b> EETPLQVRLNGLATF                            | 94.05%      |
|           |           |                                             | 779      | S          | QVAKKITVMGRS <b>SP</b> NDKLLLVQALR                            | 91.53%      |
|           |           |                                             | 560      | S          | HPKDGGEVEIS <b>SG</b> PTKAILSWAYK                             | 91.32%      |
|           |           |                                             | 372      | T          | EWGLLMASISED <b>TG</b> EETPLQVRLNG                            | 88.06%      |
|           |           |                                             | 25       | S          | SMSGRHDDMEAG <b>SA</b> KTEEHS <b>D</b> HEEL                   | 87.29%      |
|           |           |                                             | 77       | T          | ALVLNASRRFRY <b>TL</b> DLNKEEHYDNR                            | 85.11%      |
| AT1G24520 | BCP1      | 0.977                                       | 64       | T          | DQIGTTDDDAAP <b>TP</b> GDGDVAVAGPL                            | 99.56%      |
|           |           |                                             | 57       | T          | VEAPVTDDQIG <b>T</b> DDDAAPT <b>PG</b> DGD                    | 99.02%      |
|           |           |                                             | 32       | S          | LAAAASSPSP <b>SA</b> SPKAPAASKTDH                             | 98.70%      |
|           |           |                                             | 28       | S          | AIIGLAAAASSP <b>SP</b> SASPKAPAAS                             | 97.27%      |
|           |           |                                             | 56       | T          | HVEAPVTDDQIG <b>T</b> DDDAAPT <b>PG</b> DG                    | 96.32%      |
|           |           |                                             | 26       | S          | FMAIIGLAAA <b>AS</b> SPSPASPKAPA                              | 94.58%      |
|           |           |                                             | 30       | S          | IGLAAAASSP <b>SP</b> SASPKAPAASKT                             | 92.45%      |
|           |           |                                             | 50       | T          | AASKTDHVEAPV <b>T</b> DDQIGTTDDDA                             | 91.21%      |
|           |           |                                             | 78       | S          | GDGDVAVAGPL <b>GS</b> DSSYDNAPT <b>GS</b> A                   | 90.24%      |
|           |           |                                             | 42       | T          | SASPKAPAASK <b>TD</b> HVEAPVTDDQI                             | 87.84%      |
|           |           |                                             | 87       | T          | PLGSDSSYDNAP <b>TGS</b> ADSAKSGAAA                            | 87.06%      |
|           |           |                                             | 81       | S          | DVAVAGPLGSD <b>S</b> YDNAPT <b>GS</b> ADSA                    | 86.75%      |
|           |           |                                             | 40       | S          | SPSASPKAPAA <b>SK</b> TDHVEAPVTDD                             | 86.14%      |
| 80        | S         | GDVAVAGPLGSD <b>S</b> YDNAPT <b>GS</b> ADSA | 85.68%   |            |                                                               |             |
| AT4G05330 | AGD13     | 0.967                                       | 76       | S          | ISKVLSVTLDEW <b>S</b> DEEVDSMIEIGG                            | 94.50%      |
|           |           |                                             | 138      | S          | LQEFKPSLRIT <b>S</b> GKGSTKSSAFLT                             | 87.84%      |
| AT3G57390 | AGL18     | 0.965                                       | 206      | S          | PQDSSPEADPES <b>SS</b> SEEDENDNEEH                            | 99.44%      |
|           |           |                                             | 198      | S          | GPKVLNERPQD <b>SS</b> PEADPESSSSEE                            | 99.40%      |
|           |           |                                             | 208      | S          | DSSPEADPESS <b>S</b> SEEDENDNEEHHS                            | 99.15%      |
|           |           |                                             | 255      | S          | ELVCDNSGSQV <b>ASD</b> *****                                  | 98.33%      |
|           |           |                                             | 207      | S          | QDSSPEADPESS <b>S</b> SEEDENDNEEHH                            | 98.06%      |
|           |           |                                             | 205      | S          | RPQDSSPEADP <b>ES</b> SSSEEDENDNEE                            | 97.54%      |
|           |           |                                             | 197      | S          | SGPKVLNERPQD <b>SS</b> PEADPESSSSE                            | 88.93%      |
|           |           |                                             | 220      | S          | SEEDENDNEEHH <b>SD</b> TSLQLGLSSTG                            | 87.48%      |
| 20        | T         | IKKIENINSRQV <b>T</b> FSKRRNGLIKKA          | 87.26%   |            |                                                               |             |
| AT3G62230 | DAF1      | 0.964                                       |          |            |                                                               |             |
| AT5G64510 | TIN1      | 0.958                                       | 219      | T          | LLSLAEQLRRAS <b>T</b> DQESPVLSLRIV                            | 99.51%      |
|           |           |                                             | 420      | S          | TMSKLP <b>II</b> ESPP <b>SP</b> PFTL*****                     | 98.73%      |
|           |           |                                             | 242      | S          | IVGPTSLASTSQ <b>PD</b> NK <b>LK</b> LRLAP                     | 98.15%      |
|           |           |                                             | 223      | S          | AEQLRRAS <b>T</b> DQ <b>EP</b> VLSLRIVGPTS                    | 96.41%      |
|           |           |                                             | 29       | S          | FTIFPSSALIS <b>SP</b> DANPPYPK <b>AI</b> S                    | 95.06%      |
|           |           |                                             | 423      | T          | KL <b>PI</b> IESPP <b>P</b> FTL*****                          | 94.53%      |
|           |           |                                             | 218      | S          | GLLSLAEQLRRAS <b>T</b> DQESPVLSLR <b>I</b>                    | 93.71%      |
|           |           |                                             | 270      | S          | ELSSMSKDKRSL <b>S</b> TIGANAMTTVLT                            | 93.37%      |
|           |           |                                             | 126      | S          | NGLVPMRNK <b>KT</b> SDDVLPV <b>L</b> APFQL                    | 93.21%      |
|           |           |                                             | 282      | T          | STIGANAMTTV <b>L</b> TPREFTTMWPITS                            | 92.85%      |
|           |           |                                             | 240      | S          | LRIVGPTSLASTSQ <b>SP</b> DNK <b>LK</b> LRL                    | 91.75%      |
|           |           |                                             | 417      | S          | GNVTMSKLP <b>II</b> ESPP <b>SP</b> PFTL****                   | 88.94%      |
|           |           |                                             | 261      | S          | LKRLAPGLVEL <b>SS</b> MSKDKRSL <b>ST</b> IG                   | 87.29%      |
| AT2G32460 | MYB101    | 0.953                                       | 77       | T          | NHLRPNLKKG <b>S</b> FT <b>P</b> DEEK <b>II</b> DLHA           | 98.62%      |
|           |           |                                             | 406      | T          | HNKYNEPTMV <b>KV</b> TVD <b>DD</b> DELLT <b>S</b> LL          | 95.68%      |
|           |           |                                             | 314      | S          | PSNQRP <b>TH</b> SFSS <b>SP</b> IIDNGVHLEPP                   | 95.43%      |
|           |           |                                             | 289      | S          | SLLMGDLEIR <b>SS</b> FP <b>L</b> GLD <b>NS</b> VLEL           | 92.80%      |
|           |           |                                             | 186      | S          | TSSSSSFSS <b>S</b> SQPSKRLRPDPLV                              | 90.58%      |
|           |           |                                             | 465      | T          | GNHQGN <b>GR</b> VEPP <b>T</b> VPPSSVDP <b>M</b> AS           | 90.05%      |
|           |           |                                             | 310      | S          | VLELPSNQRP <b>TH</b> SFSS <b>SP</b> IIDNGVH                   | 87.22%      |
|           |           |                                             | 355      | S          | LSRGG <b>L</b> FKDVR <b>V</b> SSDLCEVQDKRV                    | 85.94%      |
| 239       | S         | DNNQFGFSV <b>PL</b> SSSSSNEVCNPNH           | 85.68%   |            |                                                               |             |
| AT3G01040 | GAUT13    | 0.947                                       | 195      | S          | YSSNAHARRQL <b>SP</b> ELLPVLS <b>D</b> NAY                    | 97.29%      |
|           |           |                                             | 311      | T          | GNHIAGANL <b>S</b> ET <b>TP</b> RTFASKLQ <b>S</b> RS          | 96.46%      |
|           |           |                                             | 323      | S          | TPRTFASKLQ <b>SR</b> PKYISLLNHL <b>R</b> I                    | 88.87%      |
| AT2G02970 | APY6      | 0.945                                       | 379      | T          | CSYQHCSIG <b>ST</b> FP <b>K</b> LRGRFLATEN                    | 94.62%      |
|           |           |                                             | 264      | S          | SEPMPEFSR <b>T</b> ISFGNVTYNLYSHS                             | 93.16%      |
|           |           |                                             | 15       | S          | RSHARSRVKNSS <b>S</b> SKSDMDPIKFQI                            | 90.62%      |
|           |           |                                             | 16       | S          | SHARSRVKNSS <b>S</b> SKSDMDPIKFQIR                            | 90.30%      |
|           |           |                                             | 18       | S          | ARSRVKNSS <b>S</b> SKSDMDPIKFQIRSG                            | 90.16%      |
|           |           |                                             | 340      | S          | HLSGLLAEESR <b>L</b> SDFQAGGNYSQC                             | 89.58%      |
|           |           |                                             | 13       | S          | MRRSHARSRVKN <b>S</b> SSSKSDMDPIKF                            | 87.80%      |
|           |           |                                             | 311      | T          | NSAVEPTREK <b>I</b> FDPCAPKGYNLDA                             | 86.48%      |
| AT5G39400 | ATPTEN1   | 0.935                                       | 299      | T          | HVNC <b>D</b> SEED <b>E</b> EV <b>T</b> DGEEP <b>H</b> LVVQMD | 99.64%      |
|           |           |                                             | 412      | S          | FGKFLSR <b>DD</b> LS <b>L</b> S*****                          | 98.64%      |
|           |           |                                             | 292      | S          | SPRY <b>Y</b> ISHVNC <b>D</b> SEED <b>E</b> EV <b>T</b> DGEEP | 98.22%      |

|           |        |       |     |   |                                                                                                                    |        |
|-----------|--------|-------|-----|---|--------------------------------------------------------------------------------------------------------------------|--------|
|           |        |       | 410 | S | SKFGKFLSRDDL <b>S</b> L <b>S</b> *****                                                                             | 94.52% |
|           |        |       | 405 | S | FGPACSKFGKFLSRDDL <b>S</b> L <b>S</b> ****                                                                         | 93.26% |
|           |        |       | 280 | S | CRQFKKGYCRSS <b>S</b> PRYYISHVNCDS                                                                                 | 93.16% |
|           |        |       | 14  | S | GLKLSRGPVKEK <b>S</b> PLEFTRVHILTY                                                                                 | 92.51% |
|           |        |       | 383 | S | ELDKVGGNGRS <b>S</b> IGPDFSLELLFGP                                                                                 | 86.48% |
| AT4G35700 | DAZ3   | 0.934 | 25  | S | ENENFDES DYL <b>W</b> SDEEGDIREIVLG                                                                                | 99.63% |
|           |        |       | 220 | S | TASSAGGLATAS <b>S</b> DGEGLVSSIGRA                                                                                 | 98.63% |
|           |        |       | 261 | S | GVGSKRKF DLN <b>R</b> SPPPDGDEENDDK                                                                                | 97.78% |
|           |        |       | 111 | T | VLEALAEASG <b>C</b> TPIGVTTTEGEVV                                                                                  | 94.74% |
|           |        |       | 88  | T | EQSASGTGDVSG <b>T</b> PEIKVVGKPRVL                                                                                 | 93.83% |
|           |        |       | 82  | T | EATGNTEQSASG <b>T</b> GDVSGTPEIKV                                                                                  | 88.03% |
|           |        |       | 217 | T | EVPTASSAGGLAT <b>A</b> SSDGEGLVSSI                                                                                 | 86.30% |
| AT3G47440 | TIP5;1 | 0.934 | 250 | T | VVVVVEDDRG <b>S</b> TGDAIGV*****                                                                                   | 97.56% |
|           |        |       | 249 | S | NVVVVEDDRG <b>S</b> TGDAIGV*****                                                                                   | 97.21% |
|           |        |       | 248 | S | DNVVVVEDDRG <b>S</b> TGDAIGV****                                                                                   | 90.82% |
| AT1G53320 | ATTL7  | 0.916 | 255 | S | RRMVSTLRC <b>P</b> SP <b>S</b> SSSAGLSSDQ                                                                          | 99.01% |
|           |        |       | 253 | S | GPRRMVSTLRC <b>P</b> SP <b>S</b> SSSAGLSS                                                                          | 98.68% |
|           |        |       | 217 | S | GKASRRFASK <b>Q</b> IS <b>P</b> QVPAGNFEVGH                                                                        | 94.61% |
|           |        |       | 259 | S | STLRC <b>P</b> SP <b>S</b> SSSAGLSSDQKPCD                                                                          | 92.61% |
|           |        |       | 258 | S | VSTLRC <b>P</b> SP <b>S</b> SSSAGLSSDQKPC                                                                          | 92.45% |
|           |        |       | 260 | S | TLRC <b>P</b> SP <b>S</b> SSSAGLSSDQKPCDV                                                                          | 92.06% |
|           |        |       | 247 | S | NLLKSRGPRRMV <b>S</b> TLRC <b>P</b> SP <b>S</b> SS                                                                 | 91.47% |
|           |        |       | 213 | S | KPSNGKASRRF <b>A</b> SK <b>Q</b> IS <b>P</b> QVPAGNF                                                               | 89.16% |
|           |        |       | 29  | S | RFHQGETT <b>A</b> PE <b>S</b> ESIPPSNMAGS                                                                          | 85.70% |
|           |        |       | 265 | S | SPSPSSSAGL <b>S</b> DQKPCDVTKIMK                                                                                   | 85.24% |
| AT2G35210 | RPA    | 0.904 | 173 | S | LKQKEKPDVV <b>P</b> SPRISRSVKKPLG                                                                                  | 99.57% |
|           |        |       | 135 | S | KSKAEEELD <b>L</b> PP <b>S</b> PPDSTQVPNGLS                                                                        | 99.27% |
|           |        |       | 223 | S | QKPEESVII <b>Q</b> AT <b>S</b> PVSAKSARSSFS                                                                        | 98.43% |
|           |        |       | 233 | S | ATSPVSAKSAR <b>S</b> FSRFDYADNVQ                                                                                   | 94.72% |
|           |        |       | 235 | S | SPVSAKSAR <b>S</b> FSRFDYADNVQNR                                                                                   | 93.21% |
|           |        |       | 336 | S | EAKSSLK <b>K</b> FG <b>S</b> SAISSADLFGDGD                                                                         | 93.18% |
|           |        |       | 252 | S | YADNVQNR <b>E</b> DY <b>M</b> SPQVVSHVAPPKS                                                                        | 93.14% |
|           |        |       | 226 | S | EESVII <b>Q</b> AT <b>S</b> PVSAKSARSSFSRF                                                                         | 90.82% |
|           |        |       | 202 | T | GKTGGLGARK <b>L</b> TKSSGTLYDQKPE                                                                                  | 89.20% |
|           |        |       | 236 | S | PVSAKSAR <b>S</b> FSRFDYADNVQNR                                                                                    | 89.07% |
|           |        |       | 151 | T | STQVPNGL <b>S</b> SI <b>K</b> TSEALKESNTLKQ                                                                        | 88.08% |
|           |        |       | 264 | S | SPQVVSHVAPP <b>K</b> SGFFEEEMNG                                                                                    | 88.00% |
|           |        |       | 229 | S | VII <b>Q</b> AT <b>S</b> PVSAK <b>S</b> ARSSFSRFDYA                                                                | 87.97% |
|           |        |       | 222 | T | DQKPEESVII <b>Q</b> AT <b>S</b> PVSAKSARSS                                                                         | 87.46% |
|           |        |       | 285 | T | EMNGGRFQ <b>K</b> K <b>P</b> ITSSSKLQIQETDE                                                                        | 87.13% |
|           |        |       | 295 | T | PITSSSKLQI <b>Q</b> ET <b>D</b> EARKKFTNAKS                                                                        | 85.35% |
| AT2G03060 | AGL30  | 0.902 | 75  | T | SMEEVIAK <b>F</b> S <b>Q</b> VT <b>P</b> QERTKRKFESL                                                               | 98.76% |
|           |        |       | 358 | S | YNDNTNQTR <b>F</b> G <b>S</b> SSSLPCSISMFD                                                                         | 87.88% |
|           |        |       | 240 | S | IPQREVECS <b>A</b> SS <b>S</b> FGSYPGYFGTGK                                                                        | 87.76% |
|           |        |       | 253 | S | FGSYPGYFGTG <b>K</b> SP <b>E</b> MTIPGQETSF                                                                        | 86.97% |
|           |        |       | 357 | S | AYNDNTNQTR <b>F</b> G <b>S</b> SSSLPCSISM                                                                          | 86.42% |
| AT5G22000 | RHF2A  | 0.894 | 228 | S | TQPPTSS <b>H</b> PR <b>Q</b> V <b>S</b> PSASDSNRPLN                                                                | 98.50% |
|           |        |       | 374 | S | RGVKETCATG <b>S</b> G <b>S</b> *****                                                                               | 96.29% |
|           |        |       | 189 | S | ASSPP <b>H</b> PP <b>M</b> PS <b>P</b> SPQRDESDTVSN                                                                | 95.71% |
|           |        |       | 191 | S | SPP <b>H</b> PP <b>M</b> PS <b>P</b> SPQRDESDTVSNLP                                                                | 95.43% |
|           |        |       | 375 | S | GVKETCATG <b>S</b> G <b>S</b> *****                                                                                | 94.56% |
|           |        |       | 332 | S | LETRENSRP <b>S</b> T <b>A</b> SVSDVSENHTPET                                                                        | 94.16% |
|           |        |       | 257 | S | SEQDRAG <b>P</b> SEL <b>Q</b> SF <b>S</b> ESLKSRLNAV                                                               | 93.40% |
|           |        |       | 196 | S | PPMPSS <b>P</b> QR <b>D</b> ES <b>T</b> TVSNLPHNALG                                                                | 91.91% |
|           |        |       | 243 | S | ASDSNSRPL <b>N</b> Q <b>S</b> SP <b>E</b> QDRAGPSEL                                                                | 91.53% |
|           |        |       | 10  | S | ***MEVRV <b>S</b> T <b>T</b> SE <b>G</b> H <b>L</b> T <b>S</b> AAAFVE                                              | 90.98% |
|           |        |       | 330 | T | ERLETRENSRP <b>S</b> T <b>A</b> SVSDVSENHTP                                                                        | 90.85% |
|           |        |       | 242 | S | SASDSNSRPL <b>N</b> Q <b>S</b> SP <b>E</b> QDRAGPSE                                                                | 90.71% |
|           |        |       | 245 | S | DSNSRPL <b>N</b> Q <b>S</b> SP <b>E</b> QDRAGPSELQS                                                                | 90.41% |
|           |        |       | 341 | T | STASVSDVSEN <b>H</b> T <b>P</b> ETNNEHNRAAA                                                                        | 90.17% |
|           |        |       | 294 | S | RNWKDRL <b>F</b> SR <b>N</b> T <b>S</b> MADLGSEVKREV                                                               | 89.27% |
|           |        |       | 162 | S | GVRREGHR <b>S</b> R <b>S</b> S <b>Q</b> GH <b>Q</b> Q <b>F</b> MFSSQ                                               | 88.44% |
|           |        |       | 198 | T | MPSS <b>P</b> QR <b>D</b> ES <b>T</b> TVSNLPHNALGEG                                                                | 88.07% |
|           |        |       | 337 | S | NSRPSTASVSDV <b>S</b> ENHTPETNNEHN                                                                                 | 87.34% |
|           |        |       | 358 | S | NEHNRAA <b>A</b> AG <b>D</b> EH <b>S</b> VNERGVK <b>E</b> T <b>C</b> A <b>T</b>                                    | 86.98% |
|           |        |       | 179 | S | QFMV <b>F</b> SS <b>Q</b> PN <b>A</b> SS <b>P</b> PP <b>H</b> PP <b>M</b> SS <b>S</b>                              | 86.64% |
|           |        |       | 300 | S | LFSRNT <b>S</b> MAD <b>L</b> G <b>S</b> EVKREVSAGIAT                                                               | 86.63% |
|           |        |       | 112 | T | NPTRNAT <b>I</b> FR <b>H</b> PT <b>L</b> GD <b>F</b> EL <b>Q</b> HL <b>P</b> V <b>G</b>                            | 86.14% |
| AT3G10470 | —      | 0.893 | 30  | S | LKGK <b>R</b> TK <b>R</b> Q <b>R</b> P <b>Q</b> SP <b>I</b> PF <b>S</b> I <b>P</b> PM <b>S</b>                     | 96.44% |
|           |        |       | 100 | T | SSSS <b>N</b> NNAT <b>L</b> K <b>A</b> T <b>A</b> DEED <b>Q</b> DMAN <b>C</b> L                                    | 93.77% |
|           |        |       | 314 | S | AIPATANT <b>A</b> L <b>S</b> L <b>S</b> PM <b>S</b> FD <b>Q</b> M <b>S</b> EG <b>P</b> I                           | 93.38% |
|           |        |       | 52  | T | MSSHE <b>P</b> DA <b>E</b> EE <b>S</b> T <b>S</b> LV <b>S</b> KE <b>K</b> SL <b>N</b> D <b>E</b>                   | 91.83% |
|           |        |       | 335 | S | EG <b>P</b> IQ <b>A</b> P <b>V</b> K <b>R</b> AR <b>S</b> AV <b>S</b> LD <b>L</b> DL <b>N</b> LP                   | 90.60% |
| AT1G68610 | PCR11  | 0.889 | 146 | T | GNMERHAR <b>L</b> AA <b>S</b> TP <b>S</b> AP <b>L</b> Q <b>A</b> PM <b>S</b> R                                     | 98.08% |
| AT1G47270 | ATTL6  | 0.885 | 285 | S | PISAI <b>Q</b> EG <b>G</b> K <b>I</b> Q <b>S</b> P <b>T</b> E <b>F</b> T <b>N</b> Q <b>G</b> K <b>K</b> K <b>K</b> | 95.17% |
|           |        |       | 235 | S | PFNR <b>L</b> PP <b>S</b> M <b>Q</b> V <b>S</b> P <b>W</b> VSSSS <b>S</b> Y <b>N</b> I                             | 87.84% |
|           |        |       | 45  | S | KNKY <b>K</b> AIG <b>R</b> RR <b>G</b> SH <b>I</b> A <b>E</b> PG <b>S</b> SVSS                                     | 85.02% |
| AT5G15470 | GAUT14 | 0.875 | 194 | S | YSSNA <b>H</b> ARR <b>Q</b> LP <b>S</b> PE <b>F</b> LP <b>V</b> LS <b>D</b> N <b>A</b> Y                           | 95.91% |

|           |          |       |     |   |                            |        |
|-----------|----------|-------|-----|---|----------------------------|--------|
|           |          |       | 310 | T | GNHVAGANLTETTPRTFASKLQSR   | 94.70% |
|           |          |       | 322 | S | TPRTFASKLQSRSPKYISLLNHLRI  | 89.10% |
| AT5G59030 | COPT1    | 0.868 | 14  | S | DHDHMHGMPRPSSSSSSPSSMMNN   | 94.18% |
|           |          |       | 17  | S | HMHGMPRPSSSSSSPSSMMNNGSM   | 90.88% |
|           |          |       | 19  | S | HGMPRPSSSSSSPSSMMNNGSMNE   | 89.30% |
|           |          |       | 94  | T | EWLAHSSLLRGSTGDSANRAAGLIQ  | 88.60% |
|           |          |       | 15  | S | HDHMHGMPRPSSSSSSPSSMMNNG   | 86.76% |
| AT5G39650 | DAU2     | 0.867 | 29  | S | PPQKPSPPSPSRSPKPVLISSPL    | 92.87% |
|           |          |       | 16  | T | TEESVIRVYTAATPPQKPSPPSPSR  | 92.76% |
|           |          |       | 27  | S | ATPPQKPSPPSPSRSPKPVLISSLP  | 87.83% |
|           |          |       | 24  | S | VYTATPPQKPSPPSPSRSPKPVLI   | 87.46% |
| AT5G23670 | LCB2     | 0.849 | 121 | T | NYLGFGSFEYCTPRVIESLKKFSA   | 89.12% |
|           |          |       | 216 | T | GSATIRVFQHNTPSHLERVLREQI   | 86.14% |
| AT3G50310 | MAPKKK20 | 0.848 | 316 | S | DSFTLDSNPSFDSFVERLGLSVGS   | 99.49% |
|           |          |       | 313 | S | DDWDSFTLDSNPSFDSFVERLGLSV  | 94.36% |
|           |          |       | 112 | T | GEGLESTVRRHTGSLRGLRHIHA    | 92.85% |
|           |          |       | 307 | T | KCPFEFDDWDSFTLDSNPSFDSFVE  | 92.54% |
|           |          |       | 8   | T | *****MEWVRGETIGFGTFSTVSTA  | 90.98% |
|           |          |       | 293 | S | VVKVKDEDKVLMSPKCPFEFDDWDS  | 89.85% |
|           |          |       | 323 | S | NPSFDSFVERLGLSVGSIPDWSVG   | 86.55% |
| AT5G02390 | DAU1     | 0.838 | 220 | S | NPLYLMSEESSNDSEEFVDNNIQ    | 99.84% |
|           |          |       | 280 | S | HTKGFSENDDDTSPRRSKACLDALN  | 99.62% |
|           |          |       | 175 | S | PVQNSKEKDSLSEVGSSDKNSSNG   | 98.92% |
|           |          |       | 273 | S | WFDPKMRHTKGFSENDDDTSPRRSK  | 98.87% |
|           |          |       | 242 | S | NIQVDDNTDGSKSDFDEKEFKKKEK  | 98.85% |
|           |          |       | 586 | S | ETLDQTMDAESEDSPVDAETEQRDI  | 98.76% |
|           |          |       | 592 | T | MDASEDSPVDAETEQRDIESTLDVE  | 98.64% |
|           |          |       | 279 | T | RHTKGFSENDDDTSPRRSKACLDAL  | 98.52% |
|           |          |       | 218 | S | SLNPLYLMSEESSNSDSEEFVDN    | 98.42% |
|           |          |       | 222 | S | LYLMSEESSNSDSEEFVDNNIQVD   | 97.81% |
|           |          |       | 240 | S | DNNIQVDDNTDGSKSDFDEKEFKK   | 97.55% |
|           |          |       | 255 | S | DFDEKEFKKKEKSDDEEAWFDPKMR  | 97.22% |
|           |          |       | 237 | T | FRVDNNIQVDDNTDGSKSDFDEKEF  | 96.95% |
|           |          |       | 310 | S | RNFLKVLQDPGSLARHFQSQSF     | 96.47% |
|           |          |       | 359 | S | FDPVGDVDKIPMPPSIAAEHRADG   | 96.28% |
|           |          |       | 80  | T | GIPVPKIKLEDKTDVESVQRPKKS   | 96.12% |
|           |          |       | 387 | S | MNETVLKLGDEDSGGYARKRGKN    | 96.10% |
|           |          |       | 571 | S | NISEISEDHSQSEHETLDQTMAS    | 95.92% |
|           |          |       | 65  | S | GTKNEVNNTIPSPDGIPVPKIKLE   | 95.53% |
|           |          |       | 613 | S | LDVEHETRSLKESSEESPNNVSTVD  | 95.53% |
|           |          |       | 179 | S | NSKEKDSLSEVGSSDKNSSNGDERN  | 94.76% |
|           |          |       | 549 | S | FHALKIDDLTVQSIIEEQDGLDNIS  | 93.70% |
|           |          |       | 185 | S | SLSEVGSSDKNSSNGDERNRVFNKK  | 93.60% |
|           |          |       | 479 | S | EGTKLKQITRASSLCSGLDRYLQLY  | 92.86% |
|           |          |       | 617 | S | HETRSLKESSEESPNNVSTVDIDEN  | 92.23% |
|           |          |       | 217 | S | GSLNPLYLMSEESSNSDSEEFVDN   | 91.40% |
|           |          |       | 93  | S | DVESVQRPKKPSAVKSKESSNSGE   | 91.25% |
|           |          |       | 599 | S | PVDAETEQRDIESTLDVEHETRSLK  | 91.23% |
|           |          |       | 614 | S | DVEHETRSLKESSEESPNNVSTVDI  | 91.18% |
|           |          |       | 716 | S | TTTGCMFQDPECNRNEEEGGNCNHL  | 91.03% |
|           |          |       | 519 | S | KSKMELEESALPSKRAPKFLGRILS  | 90.56% |
|           |          |       | 390 | S | TVLKLGDDESSGGYARKRGKNQVV   | 90.43% |
|           |          |       | 583 | S | SEHETLDQTMDAESEDSPVDAETEQR | 90.30% |
|           |          |       | 568 | S | GLDNISEISEDHSQSEHETLDQTM   | 90.29% |
|           |          |       | 579 | T | HSQSSEHETLDQTMDAESEDSPVDAE | 89.58% |
|           |          |       | 564 | S | EEQDGLDNISEISEDHSQSEHETL   | 89.54% |
|           |          |       | 646 | T | DISRDLDTETVSTSKQLDEEVLNID  | 88.90% |
|           |          |       | 796 | S | PYDEQQSFDKVMSTRDLRDDGWMDL  | 88.60% |
|           |          |       | 173 | S | TYPVQNSKEKDSLSEVGSSDKNSS   | 87.25% |
|           |          |       | 201 | S | ERNRVFNKKVGISPAVGSNLPLYLM  | 86.95% |
|           |          |       | 326 | T | RHFQSQSFSSKTMTKAGSFPTHGI   | 86.53% |
|           |          |       | 180 | S | SKEKDSLSEVGSSDKNSSNGDERNR  | 86.09% |
|           |          |       | 54  | T | HKRVPVRRTPAGTKNEVNNTIPSSP  | 86.00% |
|           |          |       | 101 | S | KKPSSAVKSKESSNSGEKTKKKNHP  | 85.64% |
| AT2G18080 | EDA2     | 0.834 | 58  | S | NELWFNQTLDHESPNDHRKFRQRY   | 90.12% |
| AT1G18750 | AGL65    | 0.829 | 75  | T | CIEEVISKFAQLTPQERTKRKLESL  | 95.57% |
|           |          |       | 286 | T | GLQQLGEEYSYTPFGTTLGMEEDQ   | 94.16% |
| AT5G53520 | ATOPT8   | 0.829 | 9   | S | *****MKDFTDTISESECDEISIVP  | 98.07% |
|           |          |       | 11  | S | **MKDFTDTISESECDEISIVPQV   | 97.85% |
|           |          |       | 35  | S | VELTVPKTDDPTSPVTFRMWVVG    | 96.79% |
|           |          |       | 30  | T | SIVPQVELTVPKTDDPTSPVTFRM   | 89.56% |
|           |          |       | 275 | S | GLDWSTIASYLGSPPLASPFASANI  | 87.16% |
| AT1G22130 | AGL104   | 0.827 | 124 | S | IALQVTNPAAINSDEVELEHEVCRL  | 94.17% |
|           |          |       | 323 | S | GVTAETQVDHEVSDYETKVPQLSSQ  | 92.83% |
|           |          |       | 334 | S | VSDYETKVPQLSSQ*****        | 90.56% |
|           |          |       | 159 | T | LRRYEPDPIRFTMEEYEVSEKQLL   | 88.41% |
|           |          |       | 249 | S | LSSAMYEPQLQSSSSSNQNNMSEC   | 87.81% |
| AT1G77980 | AGL66    | 0.824 | 124 | S | IALQLTNPTAINSDEVELEHEVYKL  | 94.00% |



|                  |                 |       |     |   |                           |        |
|------------------|-----------------|-------|-----|---|---------------------------|--------|
|                  |                 |       | 74  | S | RIEDVFSRYINLSDQERENALVFPD | 88.77% |
|                  |                 |       | 186 | S | LTRVNQRREHILSQDQLSSYEASAL | 87.89% |
|                  |                 |       | 159 | T | LRKYEPDPIRFTIMEEYETCEKQLM | 85.04% |
| <i>AT2G42380</i> | <i>ATBZIP34</i> | 0.818 | 24  | S | TQHWPDFSSQKLSPFSTPTATAVAT | 97.47% |
|                  |                 |       | 28  | T | PDFSSQKLSPFSTPTATAVATATTT | 96.65% |
|                  |                 |       | 97  | T | DRFDDEQFMSMFTDDDNLHSNPSHI | 94.19% |
|                  |                 |       | 303 | T | NANHLSATGAGATPAVDIKSSVETE | 93.16% |
|                  |                 |       | 229 | S | SVTSLQAEVSVLSPRVAFLDHQRL  | 89.08% |
|                  |                 |       | 94  | S | HQFDRFDDEQFMSMFTDDDNLHSNP | 88.97% |
|                  |                 |       | 219 | T | KLQYISELERSVTSLQAEVSVLSPR | 87.90% |
|                  |                 |       | 66  | S | SASRRGNHRRSISDSIAFLEAPT   | 87.47% |
|                  |                 |       | 64  | S | DFSASRRGNHRRSISDSIAFLEAPT | 86.89% |
|                  |                 |       | 127 | T | NVGPTGSSSNTSTPSNSFNDDNKEL | 86.54% |
| <i>AT1G19890</i> | <i>ATMGH3</i>   | 0.814 | 12  | T | *MARTKQTARKSTGGKGPRKELATK | 90.58% |

---
